# Supplementary material for: Causal association between metabolic syndrome and cholelithiasis: a Mendelian randomization study
Source: Front Endocrinol (Lausanne). 2023 Jun 9;14:1180903. doi: 10.3389/fendo.2023.1180903 (PMC10288183; doi:10.3389/fendo.2023.1180903)
Supplement: Supplementary file 2 [file Table_1.xlsx]

## Sheet: Metabolic syndrome
SNP	effect_allele.exposure	other_allele.exposure	effect_allele.outcome	other_allele.outcome	beta.exposure	beta.outcome	eaf.exposure	eaf.outcome	chr	pos	se.outcome	pval.outcome	se.exposure	exposure	pval.exposure	id.exposure	R2	F
rs1032524	T	C	T	C	-0.0145939	0.0046	0.484095	0.457	1	201790826	0.012	0.6998	0.00212142	exposure	6.01439e-12	Q1sEId	0.0101214	47.323
rs1042034	C	T	C	T	-0.0200764	0.0111	0.217694	0.267	2	21225281	0.0136	0.414	0.002142	exposure	7.06823e-21	Q1sEId	0.0137893	87.8446
rs10734924	T	G	T	G	-0.0154563	-0.0203	0.259443	0.2041	12	123018894	0.0149	0.1728	0.00258319	exposure	2.18517e-09	Q1sEId	0.00880338	35.7998
rs10768994	T	C	T	C	0.0115633	-0.0004	0.430417	0.5779	11	43936945	0.0122	0.9723	0.00211426	exposure	4.52048e-08	Q1sEId	0.00804689	29.9111
rs10779835	T	C	T	C	0.0153201	0.0059	0.390656	0.4354	1	230299949	0.0121	0.6262	0.00200935	exposure	2.4523e-14	Q1sEId	0.0112175	58.1287
rs10783779	T	G	T	G	0.012701	0.0179	0.402584	0.6114	12	56491880	0.0123	0.1459	0.00215599	exposure	3.83872e-09	Q1sEId	0.00866742	34.7025
rs10872224	G	T	G	T	-0.0138387	-0.0026	0.408549	0.3225	6	98435125	0.0128	0.8414	0.00213871	exposure	9.76271e-11	Q1sEId	0.00952009	41.8668
rs10887579	A	C	A	C	-0.0130999	-0.0038	0.353877	0.6106	10	88097210	0.0124	0.760901	0.00222773	exposure	4.09338e-09	Q1sEId	0.0086518	34.5775
rs10930502	A	G	A	G	0.0129954	0.0078	0.304175	0.7027	2	172890588	0.0131	0.5534	0.00227887	exposure	1.18011e-08	Q1sEId	0.00839022	32.5181
rs11079810	C	T	C	T	0.0194395	0.0192	0.10835	0.8893	17	46227846	0.0191	0.3141	0.00331655	exposure	4.59052e-09	Q1sEId	0.00862384	34.3544
rs11079849	C	T	C	T	0.0151839	0.0151	0.290258	0.7012	17	47090785	0.0131	0.2489	0.00232781	exposure	6.90033e-11	Q1sEId	0.00959693	42.5454
rs11162968	T	C	T	C	-0.0130959	-0.0187	0.317097	0.7543	1	80784642	0.014	0.1805	0.00227124	exposure	8.11899e-09	Q1sEId	0.00848348	33.2451
rs11165643	C	T	C	T	-0.0134393	-0.0123	0.417495	0.401	1	96924097	0.0123	0.3154	0.00217874	exposure	6.89954e-10	Q1sEId	0.0090755	38.0474
rs11187845	C	A	C	A	0.0203589	0.0071	0.0964215	0.96223	10	96060198	0.0314	0.8216	0.00353036	exposure	8.07964e-09	Q1sEId	0.00848469	33.2546
rs1138429	A	T	A	T	-0.0284379	-0.0219	0.101392	0.06821	16	56942921	0.0239	0.3586	0.00323315	exposure	1.42103e-18	Q1sEId	0.0129406	77.3621
rs1159974	T	C	T	C	-0.0132447	0.003	0.499006	0.4931	6	126090277	0.012	0.8035	0.00210767	exposure	3.29887e-10	Q1sEId	0.00924566	39.4876
rs11611246	G	T	G	T	-0.0159795	-0.0103	0.182903	0.783	12	939480	0.0146	0.4799	0.00279941	exposure	1.14208e-08	Q1sEId	0.00839843	32.5817
rs11636565	C	A	C	A	-0.0144436	-0.0174	0.488072	0.5095	15	36391846	0.012	0.1459	0.00210521	exposure	6.8438e-12	Q1sEId	0.0100943	47.0698
rs11747810	T	C	T	C	0.0127369	-0.0084	0.49503	0.5051	5	153100273	0.012	0.4854	0.00211847	exposure	1.82873e-09	Q1sEId	0.00884593	36.1467
rs11766944	G	A	G	A	0.0150607	-0.0046	0.213718	0.7364	7	1888051	0.0136	0.7346	0.00274659	exposure	4.17169e-08	Q1sEId	0.0080678	30.0668
rs11789624	T	C	T	C	0.0128303	-0.0246	0.290258	0.6888	9	111796231	0.0129	0.0568696	0.00230929	exposure	2.76087e-08	Q1sEId	0.00817452	30.8675
rs11826999	G	A	G	A	-0.023377	-0.0245	0.222664	0.7197	11	116553778	0.0134	0.0669993	0.00221934	exposure	6.06856e-26	Q1sEId	0.0154963	110.946
rs1200349	T	C	T	C	-0.0125229	-0.0193	0.482107	0.5012	15	41821752	0.012	0.107	0.00206647	exposure	1.36103e-09	Q1sEId	0.00891609	36.7224
rs12034991	A	G	A	G	-0.0131011	0.012	0.315109	0.7887	1	210145298	0.0147	0.416	0.00225189	exposure	5.96178e-09	Q1sEId	0.00855978	33.8458
rs12201987	C	T	C	T	0.0155759	-0.0011	0.204771	0.7482	6	143182396	0.0138	0.9349	0.00259227	exposure	1.87134e-09	Q1sEId	0.00884044	36.1018
rs12513212	A	C	A	C	-0.0136256	-0.0014	0.38668	0.5044	4	96149346	0.012	0.9083	0.00216041	exposure	2.8456e-10	Q1sEId	0.00927939	39.7763
rs12596491	C	T	C	T	0.0119497	0.0089	0.33996	0.6847	16	88928417	0.0129	0.4926	0.0021858	exposure	4.57822e-08	Q1sEId	0.00804358	29.8865
rs12608504	A	G	A	G	0.0162954	0.0079	0.358847	0.334	19	18389135	0.0127	0.5348	0.00222253	exposure	2.26875e-13	Q1sEId	0.0107872	53.755
rs12824567	G	C	G	C	0.0126598	0.0056	0.349901	0.2949	12	124495203	0.0132	0.6709	0.00210902	exposure	1.94088e-09	Q1sEId	0.00883173	36.0308
rs12967135	G	A	G	A	-0.0457641	-0.0258	0.239563	0.8156	18	57849023	0.0154	0.0947502	0.00266205	exposure	3.08792e-66	Q1sEId	0.0252864	295.528
rs12981256	G	A	G	A	-0.0160304	-0.0202	0.475149	0.5621	19	1865901	0.0121	0.0955608	0.0021447	exposure	7.7543e-14	Q1sEId	0.0109969	55.8648
rs13024601	C	T	C	T	0.0136111	0.0233	0.345924	0.2765	2	100902032	0.0134	0.0817203	0.0022474	exposure	1.39224e-09	Q1sEId	0.00891072	36.6782
rs13250456	C	T	C	T	-0.0247785	0.0054	0.054672	0.96684	8	72408720	0.0334	0.8715	0.00453529	exposure	4.66907e-08	Q1sEId	0.00803845	29.8484
rs1330304	C	G	C	G	0.0132156	0.0272	0.267396	0.2368	9	16714629	0.0141	0.0547394	0.00236588	exposure	2.32466e-08	Q1sEId	0.0082186	31.2013
rs13322435	A	G	A	G	0.0200764	-0.024	0.406561	0.6678	3	156795468	0.0127	0.0591998	0.00219797	exposure	6.59582e-20	Q1sEId	0.0134383	83.4284
rs13435860	A	T	A	T	-0.0133425	-0.0012	0.367793	0.3846	4	136975545	0.0123	0.9251	0.0022226	exposure	1.93571e-09	Q1sEId	0.00883237	36.036
rs1353580	T	A	T	A	-0.0121561	-0.0172	0.373757	0.4183	15	47738732	0.0121	0.1561	0.00215534	exposure	1.70043e-08	Q1sEId	0.00829817	31.8084
rs1362910	A	G	A	G	0.0142404	0.0061	0.385686	0.3717	8	30856464	0.0125	0.6252	0.00220044	exposure	9.69647e-11	Q1sEId	0.0095216	41.8801
rs1363695	C	T	C	T	0.0147305	-0.0192	0.227634	0.7191	5	130378027	0.0134	0.1531	0.0025382	exposure	6.49433e-09	Q1sEId	0.0085387	33.6793
rs1412239	C	G	C	G	-0.0223765	0.0071	0.304175	0.3762	9	28425515	0.0124	0.5684	0.00235878	exposure	2.39049e-21	Q1sEId	0.0139566	89.9891
rs1448613	G	A	G	A	0.013986	0.0227	0.385686	0.569	3	85875265	0.0121	0.0609804	0.00220834	exposure	2.40053e-10	Q1sEId	0.00931805	40.1085
rs1452075	C	T	C	T	-0.0135669	-0.0095	0.284294	0.2928	3	62481063	0.0132	0.4731	0.00236708	exposure	9.95594e-09	Q1sEId	0.00843274	32.8486
rs1458156	C	T	C	T	-0.0128128	-0.0232	0.449304	0.5307	12	41887940	0.012	0.0536896	0.00218408	exposure	4.45158e-09	Q1sEId	0.00863135	34.4142
rs1507153	C	A	C	A	-0.0128124	0.0074	0.363817	0.6052	6	79484386	0.0123	0.5461	0.00217522	exposure	3.85814e-09	Q1sEId	0.0086662	34.6927
rs1513475	T	C	T	C	0.0153726	-0.0087	0.342942	0.7161	3	35726748	0.0133	0.5131	0.00236785	exposure	8.45717e-11	Q1sEId	0.00955195	42.1475
rs1534696	C	A	C	A	0.0141531	0.0005	0.439364	0.436	7	26397239	0.0122	0.9686	0.00208892	exposure	1.24124e-11	Q1sEId	0.00996842	45.9033
rs1559900	C	T	C	T	-0.0128278	0.0187	0.291252	0.7459	8	14207321	0.0138	0.1743	0.00230766	exposure	2.71637e-08	Q1sEId	0.00817869	30.899
rs1579557	C	T	C	T	-0.0157893	-0.0199	0.285288	0.6666	6	40371918	0.0127	0.1178	0.00239746	exposure	4.52286e-11	Q1sEId	0.00968967	43.3717
rs1580099	C	A	C	A	0.0135207	0.019	0.405567	0.4073	3	94003603	0.0122	0.1194	0.00230329	exposure	4.35369e-09	Q1sEId	0.00863677	34.4575
rs17115145	C	T	C	T	-0.0122688	-0.0137	0.405567	0.5995	14	30122409	0.0122	0.2611	0.00215707	exposure	1.28747e-08	Q1sEId	0.00836836	32.3489
rs17162333	C	G	C	G	-0.0196401	0.0275	0.132207	0.134	1	27236757	0.0176	0.1188	0.00300404	exposure	6.23885e-11	Q1sEId	0.00961913	42.7425
rs17207196	C	T	C	T	0.0177207	0.0106	0.444334	0.485	7	75101065	0.012	0.3789	0.00216454	exposure	2.68221e-16	Q1sEId	0.0120448	67.0214
rs1730858	T	C	T	C	0.0147479	-0.0234	0.328032	0.2824	1	107619244	0.0134	0.0793597	0.00228284	exposure	1.04473e-10	Q1sEId	0.00950501	41.7343
rs17513613	T	C	T	C	-0.0174504	0.0213	0.289264	0.6467	19	30286822	0.0126	0.0911801	0.00237331	exposure	1.9413e-13	Q1sEId	0.0108179	54.0612
rs17639546	G	A	G	A	0.0176501	0.0124	0.148111	0.8616	3	61251635	0.0174	0.4778	0.00299182	exposure	3.64746e-09	Q1sEId	0.00867984	34.802
rs17694506	C	T	C	T	0.0144016	0.0239	0.387674	0.3593	2	171632225	0.0125	0.0568696	0.00217183	exposure	3.33277e-11	Q1sEId	0.00975619	43.9693
rs17724992	A	G	A	G	0.0142089	0.0155	0.244533	0.776	19	18454825	0.0144	0.2794	0.0024644	exposure	8.13453e-09	Q1sEId	0.00848301	33.2414
rs17806379	C	T	C	T	0.020343	-0.004	0.184891	0.8439	20	51107290	0.0165	0.8091	0.00279884	exposure	3.63872e-13	Q1sEId	0.0106937	52.827
rs1886558	A	G	A	G	0.0121424	0.0109	0.388668	0.4394	13	111982615	0.0121	0.3677	0.00221389	exposure	4.1425e-08	Q1sEId	0.00806963	30.0804
rs1914888	A	G	A	G	0.0129115	-0.0006	0.462227	0.4903	17	21267541	0.012	0.9581	0.0021295	exposure	1.33468e-09	Q1sEId	0.00892072	36.7606
rs1945941	G	A	G	A	0.0120291	-0.0003	0.375746	0.3372	11	132620118	0.0127	0.9824	0.00218398	exposure	3.63192e-08	Q1sEId	0.00810377	30.3355
rs2015407	A	G	A	G	0.0139316	0.0168	0.34493	0.3745	14	103274547	0.0124	0.1741	0.00223635	exposure	4.67519e-10	Q1sEId	0.00916562	38.8069
rs2035831	G	C	G	C	0.0128384	0.0041	0.321074	0.381	3	173683791	0.0124	0.7431	0.00226651	exposure	1.47543e-08	Q1sEId	0.00833405	32.0841
rs2060604	T	C	T	C	0.0150051	0.0034	0.413519	0.6096	8	76650334	0.0123	0.782099	0.00214748	exposure	2.80209e-12	Q1sEId	0.0102803	48.8206
rs2075226	A	G	A	G	-0.0128618	-0.0107	0.395626	0.5883	2	36805676	0.0123	0.3835	0.00230731	exposure	2.4844e-08	Q1sEId	0.00820159	31.0723
rs2178270	T	C	T	C	0.0154254	-0.005	0.189861	0.895	5	87249313	0.0195	0.7976	0.00269457	exposure	1.03673e-08	Q1sEId	0.00842263	32.7698
rs2272168	G	C	G	C	0.0168208	-0.0132	0.163022	0.2232	7	99102777	0.0144	0.3594	0.002852	exposure	3.68154e-09	Q1sEId	0.00867758	34.7839
rs2275543	T	C	T	C	-0.0191216	-0.0251	0.0994036	0.92021	9	107651174	0.0221	0.2564	0.00329607	exposure	6.57953e-09	Q1sEId	0.00853549	33.654
rs2307111	T	C	T	C	0.0253371	-0.0224	0.395626	0.5735	5	75003678	0.0121	0.0651899	0.00226364	exposure	4.40814e-29	Q1sEId	0.0164668	125.28
rs2361988	T	C	T	C	0.0142527	0.0057	0.243539	0.797	16	398151	0.0149	0.7009	0.00244764	exposure	5.77804e-09	Q1sEId	0.00856747	33.9067
rs2396625	T	A	T	A	0.0138993	-0.008	0.400596	0.374	7	113028634	0.0124	0.52	0.00218481	exposure	1.99395e-10	Q1sEId	0.00936007	40.471
rs2531686	C	G	C	G	0.0148989	0.0077	0.276342	0.2616	10	118651011	0.0136	0.571	0.00234808	exposure	2.22213e-10	Q1sEId	0.00933556	40.2593
rs2531995	C	T	C	T	-0.0188369	-0.0205	0.38668	0.4217	16	4013467	0.0122	0.0927107	0.00222805	exposure	2.80443e-17	Q1sEId	0.0124385	71.4747
rs2596933	G	A	G	A	0.0136259	-0.0141	0.267396	0.2894	3	9372124	0.0133	0.2886	0.00239397	exposure	1.25745e-08	Q1sEId	0.00837429	32.3947
rs261336	G	A	G	A	-0.019626	-0.0135	0.161034	0.2261	15	58742418	0.0144	0.3488	0.00256683	exposure	2.0732e-14	Q1sEId	0.0112493	58.4591
rs2861688	T	C	T	C	0.0155295	-0.0048	0.27336	0.7114	2	67838474	0.0132	0.716	0.0023953	exposure	8.97334e-11	Q1sEId	0.00953881	42.0316
rs2925979	T	C	T	C	0.0144179	-0.016	0.28827	0.3224	16	81534790	0.0129	0.2137	0.00223464	exposure	1.10377e-10	Q1sEId	0.00949277	41.6268
rs2990997	T	A	T	A	-0.0123401	0.0123	0.352883	0.3697	1	190119703	0.0124	0.3211	0.00223231	exposure	3.23976e-08	Q1sEId	0.00813332	30.5571
rs320	T	G	T	G	0.0307208	-0.0085	0.287276	0.7479	8	19819077	0.0138	0.5392	0.00222496	exposure	2.3024e-43	Q1sEId	0.0203113	190.635
rs3211995	G	A	G	A	0.0211365	-0.0052	0.172962	0.8107	16	2089006	0.0154	0.7374	0.0028511	exposure	1.23057e-13	Q1sEId	0.0109072	54.9571
rs323781	A	C	A	C	-0.0319295	0.0013	0.0337972	0.94991	5	86752616	0.0277	0.9634	0.00580665	exposure	3.82409e-08	Q1sEId	0.00809041	30.2355
rs349088	C	A	C	A	0.0126056	0.0109	0.480119	0.3893	11	84814393	0.0124	0.378	0.00212953	exposure	3.23019e-09	Q1sEId	0.00870928	35.0385
rs350832	G	A	G	A	-0.0144423	0.0125	0.22664	0.1915	19	4069426	0.0153	0.4131	0.00256854	exposure	1.87934e-08	Q1sEId	0.00827279	31.6142
rs3749262	G	A	G	A	-0.0187614	-0.0154	0.263419	0.735	3	131624097	0.0136	0.2576	0.00242855	exposure	1.11546e-14	Q1sEId	0.011366	59.6787
rs3808436	A	G	A	G	0.0155821	-0.02	0.432406	0.3377	8	116560967	0.0127	0.1171	0.00211133	exposure	1.58009e-13	Q1sEId	0.0108583	54.4658
rs3810291	G	A	G	A	-0.0191739	-0.0087	0.336978	0.3679	19	47569003	0.0124	0.4817	0.00226722	exposure	2.74307e-17	Q1sEId	0.0124423	71.5183
rs3814424	C	T	C	T	-0.0245532	-0.0161	0.171968	0.88	5	87968953	0.0184	0.3831	0.00299687	exposure	2.54894e-16	Q1sEId	0.0120539	67.1219
rs3814883	C	T	C	T	-0.0260472	-0.0004	0.460239	0.5881	16	29994922	0.0122	0.9737	0.00225489	exposure	7.26009e-31	Q1sEId	0.0169938	133.43
rs3902840	G	A	G	A	-0.0206311	-0.0064	0.0924453	0.8679	9	129419025	0.0178	0.719	0.00365935	exposure	1.72128e-08	Q1sEId	0.00829508	31.7848
rs397092	A	G	A	G	-0.0129741	-0.0098	0.456262	0.4339	21	46582564	0.0121	0.4155	0.0021273	exposure	1.06839e-09	Q1sEId	0.0089732	37.1944
rs40067	G	A	G	A	0.018132	0.0042	0.17992	0.7905	5	107439012	0.0147	0.7756	0.00274633	exposure	4.04919e-11	Q1sEId	0.00971382	43.5882
rs4283409	A	G	A	G	-0.0124719	0.0016	0.38668	0.4104	2	228977142	0.0122	0.8968	0.00215917	exposure	7.63776e-09	Q1sEId	0.00849863	33.3639
rs429343	A	G	A	G	0.0121098	0.0099	0.437376	0.4689	2	147903382	0.012	0.4124	0.00212766	exposure	1.25859e-08	Q1sEId	0.00837406	32.393
rs442177	G	T	G	T	-0.0111202	0.0008	0.421471	0.4767	4	88030261	0.012	0.9463	0.00202339	exposure	3.88894e-08	Q1sEId	0.00808604	30.2029
rs4482463	C	A	C	A	0.0285972	0.0232	0.080517	0.0599	2	205375909	0.0253	0.3585	0.00413685	exposure	4.75219e-12	Q1sEId	0.0101706	47.7848
rs4660208	A	G	A	G	-0.022772	0.0065	0.194831	0.8104	1	39722214	0.0154	0.6712	0.00261222	exposure	2.84445e-18	Q1sEId	0.0128255	75.9916
rs4693325	A	C	A	C	-0.0158517	0.0104	0.198807	0.2045	4	94408529	0.0149	0.4878	0.00263315	exposure	1.74359e-09	Q1sEId	0.00885729	36.2396
rs4740619	T	C	T	C	0.0137939	0.0183	0.481113	0.4884	9	15634326	0.012	0.1279	0.00211055	exposure	6.33308e-11	Q1sEId	0.00961583	42.7131
rs4755720	C	T	C	T	0.0164941	0.012	0.399602	0.3742	11	43628749	0.0124	0.3354	0.00218594	exposure	4.50422e-14	Q1sEId	0.0111015	56.9329
rs4790292	C	A	C	A	0.0195983	-0.0034	0.144135	0.8299	17	1824305	0.016	0.8308	0.00310216	exposure	2.65561e-10	Q1sEId	0.00929511	39.9112
rs4805758	G	A	G	A	0.0203308	0.0014	0.162028	0.7795	19	32866424	0.0145	0.924	0.0028194	exposure	5.55276e-13	Q1sEId	0.0106094	51.997
rs4810479	C	T	C	T	0.0130141	0.0195	0.28827	0.253	20	44545048	0.0138	0.1564	0.00210379	exposure	6.16959e-10	Q1sEId	0.00910148	38.2656
rs4890439	G	A	G	A	0.0120766	0.0095	0.374751	0.5537	18	40732586	0.0121	0.4321	0.00220935	exposure	4.59935e-08	Q1sEId	0.00804238	29.8775
rs4929923	T	C	T	C	-0.0145256	0.0039	0.37674	0.3525	11	8639200	0.0125	0.7539	0.00220278	exposure	4.275e-11	Q1sEId	0.00970198	43.482
rs4947406	T	G	T	G	0.0162488	-0.002	0.349901	0.4141	7	50661735	0.0122	0.8714	0.00238385	exposure	9.34683e-12	Q1sEId	0.0100286	46.459
rs4971632	T	C	T	C	0.0171492	-0.0029	0.166004	0.1364	2	50240091	0.0175	0.8673	0.00282426	exposure	1.26262e-09	Q1sEId	0.00893383	36.8687
rs502153	C	T	C	T	-0.0124332	0.0048	0.442346	0.5068	3	161491243	0.012	0.6916	0.00214428	exposure	6.69849e-09	Q1sEId	0.00853107	33.6191
rs545608	G	C	G	C	-0.0380443	0.0162	0.185885	0.1788	1	177899121	0.0157	0.3022	0.00297444	exposure	1.85541e-37	Q1sEId	0.0188159	163.588
rs6115015	G	A	G	A	-0.0130126	0.0149	0.333002	0.3242	20	25027692	0.0129	0.2468	0.0022402	exposure	6.29699e-09	Q1sEId	0.00854631	33.7394
rs645040	G	T	G	T	-0.0230622	0.0292	0.228628	0.1486	3	135926622	0.0168	0.0826495	0.00247794	exposure	1.31445e-20	Q1sEId	0.0136927	86.6176
rs6463489	T	C	T	C	0.0236128	-0.0125	0.068588	0.0713	7	5542513	0.0232	0.5916	0.00412382	exposure	1.02854e-08	Q1sEId	0.00842461	32.7853
rs6484478	A	G	A	G	-0.0158577	0.0113	0.220676	0.181	11	30306440	0.0155	0.4673	0.00256159	exposure	5.99444e-10	Q1sEId	0.00910816	38.3217
rs649458	T	A	T	A	0.0178347	-0.022	0.137177	0.1156	1	23712528	0.0189	0.2426	0.00306091	exposure	5.65708e-09	Q1sEId	0.00857267	33.9478
rs6499240	A	G	A	G	-0.020163	-0.0192	0.422465	0.431	16	69686912	0.0121	0.1132	0.00229435	exposure	1.52126e-18	Q1sEId	0.0129293	77.2275
rs6545714	G	A	G	A	0.019027	0.0166	0.38171	0.401	2	59307725	0.0122	0.1751	0.00218549	exposure	3.14581e-18	Q1sEId	0.0128087	75.7928
rs6575340	G	A	G	A	-0.013607	-0.0013	0.37674	0.3726	14	94023972	0.0124	0.915	0.00221992	exposure	8.81593e-10	Q1sEId	0.0090183	37.5692
rs6577584	T	G	T	G	-0.0139474	-0.0007	0.371769	0.6531	1	6715390	0.0126	0.9541	0.00218241	exposure	1.64995e-10	Q1sEId	0.00940276	40.841
rs6602151	T	C	T	C	-0.0145814	0.0084	0.294235	0.286	10	16764483	0.0133	0.527499	0.00235441	exposure	5.89483e-10	Q1sEId	0.00911205	38.3544
rs6603004	A	G	A	G	-0.0126565	0.0024	0.466203	0.4815	15	84568504	0.012	0.8409	0.00210465	exposure	1.81478e-09	Q1sEId	0.00884776	36.1616
rs6673977	A	G	A	G	-0.0124986	-0.0159	0.353877	0.5718	1	7736097	0.0122	0.1908	0.00221322	exposure	1.63017e-08	Q1sEId	0.00830885	31.8904
rs6711375	G	A	G	A	-0.0137646	-0.0106	0.32008	0.2924	2	161090873	0.0132	0.4222	0.00225937	exposure	1.11363e-09	Q1sEId	0.00896344	37.1136
rs6754311	T	C	T	C	0.0133991	-0.0049	0.489066	0.5949	2	136707982	0.0123	0.6921	0.0021418	exposure	3.95022e-10	Q1sEId	0.00920438	39.1358
rs676387	C	A	C	A	-0.0130781	-0.0036	0.266402	0.7589	17	40706273	0.014	0.7958	0.00236992	exposure	3.42192e-08	Q1sEId	0.00811919	30.451
rs687672	T	C	T	C	0.0213915	0.0245	0.188867	0.1603	11	65649984	0.0163	0.1336	0.00284843	exposure	5.91567e-14	Q1sEId	0.0110491	56.3969
rs703965	C	T	C	T	-0.0122086	-0.015	0.456262	0.5507	10	80955067	0.0121	0.215	0.00211838	exposure	8.25474e-09	Q1sEId	0.00847937	33.2129
rs7132908	G	A	G	A	-0.0185431	-0.0222	0.356859	0.6161	12	50263148	0.0124	0.07305	0.00239215	exposure	9.06931e-15	Q1sEId	0.0114047	60.086
rs7144011	G	T	G	T	-0.0228031	-0.0207	0.206759	0.7602	14	79940383	0.014	0.1403	0.00267899	exposure	1.71228e-17	Q1sEId	0.0125229	72.4482
rs7198357	C	T	C	T	0.0171588	-0.004	0.177932	0.8188	16	67884619	0.0156	0.7957	0.00259944	exposure	4.08532e-11	Q1sEId	0.00971188	43.5708
rs7206608	C	G	C	G	-0.0129809	0.0162	0.313121	0.3526	16	82872628	0.0125	0.1972	0.00228099	exposure	1.26365e-08	Q1sEId	0.00837306	32.3852
rs7212293	A	G	A	G	-0.0220869	-0.0231	0.215706	0.7582	17	65847325	0.014	0.099049	0.0026258	exposure	4.0479e-17	Q1sEId	0.0123754	70.7506
rs7241918	G	T	G	T	0.0181	-0.0165	0.163022	0.171	18	47160953	0.0159	0.2988	0.00252454	exposure	7.52047e-13	Q1sEId	0.0105485	51.4015
rs741959	A	G	A	G	0.0141858	0.0026	0.40159	0.3822	1	47676233	0.0123	0.8348	0.00216939	exposure	6.18903e-11	Q1sEId	0.00962089	42.7582
rs7488867	C	T	C	T	0.0151581	-0.0079	0.281312	0.696	12	103699685	0.0131	0.543599	0.00251081	exposure	1.56873e-09	Q1sEId	0.00888242	36.4456
rs7581217	T	C	T	C	0.0126845	-0.0061	0.369781	0.3626	2	25524944	0.0126	0.627001	0.00217998	exposure	5.93255e-09	Q1sEId	0.00856099	33.8553
rs7601028	C	G	C	G	-0.0462252	-0.0253	0.173956	0.1626	2	642499	0.0162	0.1181	0.00302499	exposure	1.0221e-52	Q1sEId	0.0224782	233.503
rs7642876	A	G	A	G	0.0122238	0.0145	0.403579	0.3844	3	15883933	0.0123	0.2405	0.002152	exposure	1.34534e-08	Q1sEId	0.00835731	32.2635
rs7668263	T	C	T	C	-0.0118439	0.001	0.38171	0.6742	4	143781835	0.0128	0.9382	0.00216065	exposure	4.21365e-08	Q1sEId	0.0080652	30.0474
rs779655	G	C	G	C	-0.0135525	-0.0054	0.272366	0.3222	5	170495158	0.0128	0.677001	0.00237858	exposure	1.21427e-08	Q1sEId	0.00838306	32.4626
rs7928842	T	C	T	C	-0.0199655	-0.0211	0.422465	0.6027	11	47566352	0.0126	0.0923294	0.00215908	exposure	2.30376e-20	Q1sEId	0.0136047	85.508
rs7982447	T	C	T	C	-0.0191272	0.0015	0.199801	0.804	13	54453811	0.0151	0.9195	0.00266231	exposure	6.74725e-13	Q1sEId	0.0105703	51.6145
rs8055138	C	T	C	T	-0.030298	-0.0214	0.329026	0.5873	16	28891465	0.0122	0.0783303	0.00243807	exposure	1.86371e-35	Q1sEId	0.0182816	154.426
rs8078079	T	C	T	C	0.014604	0.0142	0.394632	0.6311	17	34959346	0.0125	0.2555	0.00219549	exposure	2.89481e-11	Q1sEId	0.00978673	44.2451
rs808820	A	G	A	G	-0.0215066	0.0274	0.116302	0.8902	12	89744826	0.0193	0.1555	0.00350403	exposure	8.37405e-10	Q1sEId	0.00903033	37.6695
rs818524	T	C	T	C	-0.0128911	-0.0252	0.289264	0.2683	1	85201228	0.0136	0.06364	0.00232237	exposure	2.84306e-08	Q1sEId	0.00816698	30.8106
rs834867	T	A	T	A	-0.0128816	0.0044	0.411531	0.3465	3	82664278	0.0126	0.7275	0.00229038	exposure	1.8635e-08	Q1sEId	0.00827494	31.6306
rs906673	C	T	C	T	0.0128915	0.0148	0.388668	0.4364	3	12898941	0.0121	0.2206	0.00218567	exposure	3.67482e-09	Q1sEId	0.00867803	34.7874
rs909892	G	A	G	A	0.0167515	-0.0105	0.150099	0.8992	20	41982698	0.0199	0.598401	0.00295262	exposure	1.39967e-08	Q1sEId	0.00834734	32.1865
rs938875	A	G	A	G	-0.0191222	-0.0166	0.407555	0.3562	15	67952922	0.0125	0.1842	0.00220125	exposure	3.72302e-18	Q1sEId	0.0127805	75.4601
rs9478499	T	A	T	A	-0.0190503	-0.0253	0.147117	0.1815	6	154345289	0.0156	0.1047	0.00296657	exposure	1.3478e-10	Q1sEId	0.00944815	41.2363
rs9556979	T	G	T	G	-0.013481	-0.0104	0.324056	0.6517	13	99241507	0.0127	0.4119	0.0022991	exposure	4.52909e-09	Q1sEId	0.00862713	34.3806
rs9630985	A	C	A	C	-0.014485	-0.006	0.348907	0.2611	2	181607676	0.0137	0.6595	0.00223606	exposure	9.29994e-11	Q1sEId	0.00953088	41.9617
rs9686661	C	T	C	T	-0.0226813	-0.002	0.185885	0.865	5	55861786	0.0176	0.9077	0.00261859	exposure	4.64903e-18	Q1sEId	0.0127434	75.0216
rs9816226	A	T	A	T	-0.01592	-0.0028	0.187873	0.1616	3	185834499	0.0163	0.8621	0.00276527	exposure	8.55592e-09	Q1sEId	0.00847047	33.1432
rs987237	A	G	A	G	-0.0304854	-0.0122	0.180915	0.7884	6	50803050	0.0146	0.404	0.00290076	exposure	7.81375e-26	Q1sEId	0.0154613	110.445
rs998584	C	A	C	A	-0.0133734	-0.0026	0.496024	0.5177	6	43757896	0.0121	0.8278	0.00206792	exposure	9.99376e-11	Q1sEId	0.00951489	41.821

## Sheet: Fasting blood glucose
SNP	effect_allele.exposure	other_allele.exposure	effect_allele.outcome	other_allele.outcome	beta.exposure	beta.outcome	eaf.exposure	eaf.outcome	chr	pos	se.outcome	pval.outcome	se.exposure	samplesize.exposure	pos.exposure	pval.exposure	chr.exposure	R2	F
rs10276674	C	T	C	T	0.039	0.0182	0.836	0.2067	7	14922007	0.0148	0.2177	0.0043	58074	14922007	7.77e-20	7	0.0378166	83.1676
rs10830963	G	C	G	C	0.079	-0.0098	0.7	0.6433	11	92708710	0.0125	0.4335	0.0037	58074	92708710	2.2e-100	11	0.0880887	454.14
rs10974438	C	A	C	A	0.019	-0.0133	0.608	0.3759	9	4291928	0.0124	0.2822	0.0033	58074	4291928	5.23e-09	9	0.0242299	34.1133
rs11039138	A	G	A	G	-0.021	0.0217	0.386	0.2844	11	47249223	0.0133	0.1022	0.0032	58074	47249223	1.74e-10	11	0.0264817	40.7534
rs11195502	T	C	T	C	-0.035	-0.0197	0.075	0.0889	10	113039667	0.0212	0.3533	0.0054	58074	113039667	1.04e-10	10	0.0268096	41.7696
rs11558471	G	A	G	A	-0.029	-0.0231	0.748	0.3784	8	118185733	0.0124	0.0619798	0.0034	58074	118185733	7.06e-18	8	0.0357336	74.2464
rs11603334	A	G	A	G	-0.023	0.0057	0.129	0.2369	11	72432985	0.0141	0.6867	0.0041	58074	72432985	2.92e-08	11	0.0230122	30.7691
rs11605924	C	A	C	A	-0.022	-0.011	0.542	0.4652	11	45873091	0.0122	0.3675	0.0031	58074	45873091	2.99e-13	11	0.0302642	53.2381
rs17747324	C	T	C	T	0.024	0.0023	0.808	0.1895	10	114752503	0.0154	0.882	0.0039	58074	114752503	7.5e-10	10	0.0255378	37.898
rs2191349	T	G	T	G	0.028	-0.014	0.467	0.4593	7	15064309	0.012	0.2464	0.0031	58074	15064309	1.98e-20	7	0.0384274	85.8798
rs2908282	A	G	A	G	0.064	0.0041	0.199	0.1071	7	44248828	0.0194	0.8345	0.0042	58074	44248828	3.51e-53	7	0.0636361	236.122
rs4148804	T	C	T	C	0.083	0.0332	0.013	0.04372	2	169779205	0.0294	0.2586	0.014	58074	169779205	1.85e-09	2	0.0249367	36.134
rs4869272	T	C	T	C	0.02	0.0019	0.323	0.6714	5	95539448	0.0127	0.8808	0.0033	58074	95539448	2.7e-09	5	0.0246831	35.4023
rs560887	C	T	C	T	0.071	-0.0124	0.674	0.6939	2	169763148	0.0131	0.3444	0.0034	58074	169763148	2.63e-99	2	0.0876071	449.15
rs6113722	A	G	A	G	-0.042	-0.0344	0.04	0.03725	20	22557099	0.0315	0.275	0.0077	58074	22557099	3.89e-08	20	0.0228024	30.2102
rs7173964	A	G	A	G	-0.02	-0.0175	0.38	0.5529	15	62396942	0.0121	0.1463	0.0031	58074	62396942	1.04e-10	15	0.0268054	41.7564
rs7644261	G	C	G	C	-0.021	0.0004	0.742	0.737	3	170676134	0.0136	0.9768	0.0034	58074	170676134	8.18e-10	3	0.0254806	37.7283
rs882020	T	C	T	C	0.029	0.0188	0.121	0.1701	7	44178743	0.016	0.2416	0.0045	58074	44178743	1.36e-10	7	0.0266382	41.2368

## Sheet: Waist circumference
SNP	effect_allele.exposure	other_allele.exposure	effect_allele.outcome	other_allele.outcome	beta.exposure	beta.outcome	eaf.exposure	eaf.outcome	chr	pos	se.outcome	pval.outcome	pval.exposure	se.exposure	samplesize.exposure	chr.exposure	pos.exposure	R2	F
rs10150482	A	G	A	G	0.0219574	0.0237	0.22035	0.2379	14	79891882	0.014	0.0911108	4.5e-24	0.00216957	462166	14	79891882	0.0148846	102.416
rs1019240	T	A	T	A	0.0124023	0.0125	0.643153	0.6033	9	122972617	0.0123	0.3069	3.7e-11	0.00187454	462166	9	122957315	0.00973087	43.7664
rs10248298	A	C	A	C	0.0132553	0.0158	0.366037	0.3887	7	121963813	0.0123	0.1985	8.8e-13	0.00185427	462166	7	121963813	0.010514	51.095
rs1025065	G	T	G	T	-0.010284	0.0113	0.639097	0.7027	16	82451159	0.0131	0.391	3.6e-08	0.00186623	462166	16	82451159	0.0081039	30.3538
rs10257197	G	A	G	A	-0.0154813	0.0214	0.841665	0.8026	7	76569775	0.0151	0.1571	3e-10	0.00245771	462166	7	76569775	0.00926488	39.6746
rs10269774	A	G	A	G	0.0119597	-0.0012	0.326456	0.3081	7	92253972	0.013	0.927	3.6e-10	0.00190774	462166	7	92253972	0.00922322	39.3186
rs1037702	A	G	A	G	-0.0101871	-0.0006	0.621776	0.6098	4	180168024	0.0123	0.9605	3.6e-08	0.00184913	462166	4	180168024	0.0081039	30.3538
rs10471636	A	G	A	G	-0.010111	0.0058	0.508891	0.5276	5	63979856	0.0121	0.6303	3e-08	0.00182385	462166	5	63979856	0.00815098	30.7075
rs10490869	T	A	T	A	0.0163389	-0.004	0.209589	0.2211	3	35635145	0.0145	0.781601	1.2e-13	0.00220375	462166	3	35635145	0.0109092	55.0086
rs10505836	C	A	C	A	0.0152705	-0.0074	0.860023	0.8669	12	19288508	0.0177	0.674599	4.1e-09	0.00259774	462166	12	19288508	0.0086491	34.5757
rs1051613	A	G	A	G	-0.00995199	0.0148	0.544526	0.5168	4	951179	0.0121	0.2215	3.1e-08	0.00179742	462166	4	951179	0.00814253	30.6439
rs1056441	C	T	C	T	0.0127063	-0.0232	0.675421	0.7436	20	62370349	0.0137	0.0904399	3.1e-11	0.00191349	462166	20	62370349	0.00976927	44.1125
rs10732335	C	A	C	A	-0.0147414	-0.0161	0.442949	0.507	9	15862077	0.012	0.1798	3.1e-16	0.00180443	462166	9	15862077	0.012016	66.7385
rs10757898	A	G	A	G	-0.00996701	-0.014	0.520113	0.5135	9	29622600	0.012	0.2458	4e-08	0.00181479	462166	9	29622600	0.00807658	30.1495
rs1078455	C	T	C	T	0.0111735	-0.0093	0.309501	0.2986	3	108129348	0.0132	0.4805	9.7e-09	0.00194801	462166	3	108129348	0.00843699	32.9005
rs10787738	T	C	T	C	0.0153066	0.0132	0.254549	0.2554	10	118777371	0.0138	0.3377	2.1e-13	0.00208556	462166	10	118777371	0.0107996	53.909
rs10795418	G	A	G	A	0.0127004	0.0092	0.664754	0.6886	10	16744334	0.013	0.4772	2.4e-11	0.00190172	462166	10	16744334	0.00982462	44.6138
rs10803762	A	G	A	G	0.0119451	0.0101	0.677313	0.7074	2	161105876	0.0132	0.4432	4.4e-10	0.00191493	462166	2	161105876	0.00917715	38.9268
rs10824211	T	C	T	C	0.0150646	0.032	0.139518	0.0882	10	76363107	0.0211	0.1288	6.3e-09	0.00259306	462166	10	76363107	0.00854392	33.7398
rs10827380	T	C	T	C	0.0116104	0.0005	0.314309	0.4015	10	34822258	0.0123	0.9685	1.8e-09	0.0019302	462166	10	34822258	0.00884735	36.179
rs10835676	G	C	G	C	0.0123512	0.0261	0.240436	0.2771	11	30531316	0.0135	0.0534897	4e-09	0.00209843	462166	11	30531316	0.00865511	34.6237
rs10957087	A	T	A	T	0.0139437	-0.0033	0.159639	0.2482	8	60220423	0.0139	0.8131	1.2e-08	0.00244363	462166	8	60220423	0.00838379	32.4869
rs10992854	C	T	C	T	-0.0112545	0.0188	0.681971	0.6539	9	96437565	0.0126	0.1354	5.4e-09	0.00192897	462166	9	96437565	0.00858181	34.0397
rs11058233	G	A	G	A	0.0159705	0.0224	0.750601	0.8086	12	122943915	0.0152	0.1419	1.2e-14	0.00206852	462166	12	122940075	0.0113493	59.5372
rs1108548	G	A	G	A	0.0121715	0.0091	0.277245	0.3101	1	218634787	0.013	0.4827	1.2e-09	0.00200003	462166	1	218634787	0.00894346	36.9694
rs11099020	T	C	T	C	-0.0112449	-0.0075	0.640565	0.6044	4	130724902	0.0123	0.5433	1.7e-09	0.00186604	462166	4	130724902	0.00886096	36.2904
rs1111817	G	C	G	C	-0.0105597	-0.0193	0.365048	0.3605	9	23226898	0.0126	0.1238	2e-08	0.00188105	462166	9	23226898	0.00825477	31.4946
rs111258054	T	C	T	C	0.0159528	0.0223	0.183665	0.2829	11	134611390	0.0134	0.0968902	9.5e-12	0.00234105	462166	11	134611390	0.0100225	46.4291
rs11150745	G	A	G	A	-0.0160848	-0.0225	0.317708	0.2798	17	78757626	0.0134	0.0927705	6.8e-17	0.00192604	462166	17	78757626	0.0122823	69.7302
rs11160600	G	A	G	A	0.0180478	-0.0101	0.092347	0.1558	14	101186626	0.0166	0.5423	7.1e-09	0.00311766	462166	14	101186626	0.00851443	33.5072
rs11162968	C	T	C	T	0.0122283	0.0187	0.31619	0.2457	1	80784642	0.014	0.1805	2.1e-10	0.00192412	462166	1	80784642	0.00934587	40.3713
rs11165493	A	G	A	G	0.0107576	0.0183	0.343044	0.3782	1	96274928	0.0124	0.1383	1.3e-08	0.00189335	462166	1	96274928	0.0083637	32.3313
rs1117619	G	C	G	C	-0.0120513	0.0115	0.250101	0.264	3	173747092	0.0136	0.3963	5e-09	0.00206049	462166	3	173747092	0.00860066	34.1894
rs11196657	C	T	C	T	0.0124451	0.0127	0.236715	0.2148	10	115976570	0.0146	0.3829	3.4e-09	0.00210599	462166	10	115976570	0.00869456	34.9401
rs11215381	C	T	C	T	0.0111759	-0.0031	0.525856	0.5234	11	115022233	0.012	0.7993	4.6e-10	0.00179363	462166	11	115022233	0.00916692	38.84
rs11218510	A	G	A	G	-0.0115323	-0.0035	0.40049	0.3609	11	121922587	0.0125	0.780001	2.9e-10	0.00182872	462166	11	121922587	0.0092726	39.7408
rs11223204	G	A	G	A	0.0122154	-0.009	0.434214	0.3407	11	132652554	0.0127	0.4799	1.5e-11	0.00180899	462166	11	132652554	0.00992542	45.5341
rs113866544	C	T	C	T	0.0303242	0.0346	0.068322	0.1066	17	46270606	0.0195	0.0759102	1.4e-17	0.003552	462166	17	46270606	0.0125539	72.8485
rs114964326	A	G	A	G	-0.0301131	0.0032	0.028947	0.01419	2	146015229	0.0507	0.949	2.1e-08	0.00537007	462166	2	146015229	0.00824234	31.3998
rs115056380	A	G	A	G	-0.0236683	0.0212	0.048334	0.03274	1	111338672	0.0335	0.5281	1.3e-08	0.00416636	462166	1	111338672	0.0083637	32.3313
rs11603984	T	G	T	G	-0.0169839	-0.0043	0.135129	0.2036	11	85238368	0.0149	0.7755	8.9e-11	0.00261937	462166	11	85238368	0.00953809	42.0493
rs11614326	A	G	A	G	-0.0102606	0.0079	0.545054	0.4538	12	122269182	0.0121	0.5155	1.6e-08	0.0018167	462166	12	122269182	0.00831136	31.9279
rs11636611	T	C	T	C	0.0107144	0.0175	0.502804	0.4905	15	36391965	0.012	0.1448	2.3e-09	0.00179296	462166	15	36391965	0.00878876	35.7014
rs11639596	C	A	C	A	-0.011872	-0.0119	0.250798	0.3069	16	9370690	0.013	0.3626	1.1e-08	0.00207809	462166	16	9370690	0.00840559	32.656
rs11653367	G	A	G	A	-0.0151666	-0.016	0.328129	0.3599	17	44191483	0.0126	0.2026	2.5e-15	0.00191685	462166	17	44191483	0.0116399	62.6256
rs11675464	G	A	G	A	0.0112729	0.022	0.562997	0.4502	2	204053742	0.0121	0.0681005	3.7e-10	0.00179869	462166	2	204053742	0.00921694	39.2651
rs11757278	C	T	C	T	-0.012784	0.0023	0.303836	0.3904	6	13180454	0.0123	0.849	4.9e-11	0.00194427	462166	6	13180454	0.00966958	43.2167
rs11767811	A	G	A	G	-0.0150345	-0.0057	0.181372	0.208	7	71620988	0.0148	0.7003	8.9e-11	0.00231875	462166	7	71620988	0.00953809	42.0493
rs11773362	T	C	T	C	-0.0104772	0.0083	0.336125	0.379	7	147668180	0.0124	0.5001	3.2e-08	0.0018937	462166	7	147668180	0.00813435	30.5823
rs11787216	T	C	T	C	0.011505	0.007	0.369092	0.3549	8	142615222	0.0125	0.5737	1.2e-09	0.0018915	462166	8	142615222	0.00894346	36.9694
rs1182199	A	C	A	C	-0.0135196	-0.0199	0.3044	0.3616	7	2862542	0.0125	0.1113	3.6e-12	0.00194469	462166	7	2862542	0.0102257	48.3311
rs1183668	G	C	G	C	-0.0120589	-0.0012	0.37014	0.3343	13	112191837	0.0127	0.9239	9.3e-11	0.00186172	462166	13	112191837	0.00952833	41.9633
rs11842871	T	G	T	G	-0.0127878	0.0214	0.259942	0.3267	13	31042452	0.0128	0.0948899	4e-10	0.00204439	462166	13	31042452	0.00919906	39.1129
rs1188209	G	A	G	A	0.0102398	-0.0145	0.551608	0.4854	14	56462082	0.012	0.2281	1.6e-08	0.00181136	462166	14	56462082	0.00831136	31.9279
rs11898037	C	T	C	T	0.0105694	-0.0017	0.367606	0.4262	2	36558986	0.0121	0.8857	1.2e-08	0.00185324	462166	2	36558986	0.00838379	32.4869
rs1191600	A	C	A	C	-0.0108005	-0.0144	0.59357	0.582	14	30101641	0.0122	0.2376	3.8e-09	0.00183345	462166	14	30101641	0.00866758	34.7236
rs12001437	C	T	C	T	0.0109331	0.019	0.367701	0.3538	9	34074476	0.0125	0.129	3.8e-09	0.00185543	462166	9	34074476	0.00866758	34.7236
rs12042959	G	A	G	A	-0.014934	-0.0252	0.143895	0.159	1	243533273	0.0164	0.1234	5.2e-09	0.00255686	462166	1	243533273	0.00859106	34.1131
rs12072739	G	A	G	A	0.0162106	0.0025	0.224447	0.3158	1	98315893	0.0129	0.8445	3.9e-14	0.00214325	462166	1	98315893	0.0111261	57.2183
rs12107172	G	A	G	A	0.0156855	0.0128	0.136472	0.1884	3	147134039	0.0153	0.405	1.8e-09	0.00260901	462166	3	147134039	0.00884735	36.179
rs12140153	T	G	T	G	-0.0265936	-0.0354	0.094226	0.07887	1	62579891	0.0224	0.1141	2.1e-17	0.00313243	462166	1	62579891	0.0124848	72.0483
rs1218824	A	G	A	G	0.012491	0.0197	0.661499	0.6669	13	28010734	0.0127	0.1212	4.2e-11	0.00189332	462166	13	28010734	0.00970329	43.5186
rs12225345	G	A	G	A	0.0145982	0.0245	0.165688	0.1603	11	65648135	0.0163	0.1331	1.3e-09	0.00240459	462166	11	65647105	0.00892457	36.8133
rs12245654	C	A	C	A	0.023047	0.0036	0.072559	0.1153	10	87562928	0.0189	0.8495	3.2e-11	0.00347158	462166	10	87562928	0.00976243	44.0508
rs12273545	T	C	T	C	0.0222638	0.0441	0.056494	0.07425	11	116911012	0.0229	0.0547898	9.4e-09	0.00387781	462166	11	116911012	0.00844481	32.9615
rs12287076	C	G	C	G	0.0210638	0.0022	0.707082	0.7706	11	47606865	0.0142	0.875	1.3e-26	0.00197238	462166	11	47606865	0.015704	114.005
rs1229984	C	T	C	T	0.0301377	-0.0851	0.972777	0.9946	4	100239319	0.0816	0.297	2.8e-08	0.00542443	462166	4	100239319	0.00816873	30.8414
rs12375196	A	C	A	C	0.0132187	-0.0046	0.424364	0.4656	7	103416541	0.012	0.702	3.8e-13	0.00182044	462166	7	103416541	0.0106823	52.7438
rs12462975	A	G	A	G	0.01754	-0.0131	0.329671	0.3194	19	30272202	0.0129	0.3106	5.9e-20	0.00191777	462166	19	30272202	0.0134524	83.6518
rs12463617	C	A	C	A	0.0431919	0.0254	0.828064	0.8381	2	629244	0.0162	0.1173	1.8e-74	0.00236577	462166	2	629244	0.0268466	333.34
rs12478299	C	T	C	T	-0.0115796	-0.0189	0.252015	0.2589	2	193811641	0.0137	0.1681	1.9e-08	0.00206169	462166	2	193811641	0.00826781	31.5942
rs12877270	A	G	A	G	0.0117224	0.0174	0.442217	0.5312	13	97047020	0.012	0.1492	1.1e-10	0.00181553	462166	13	97047020	0.00949101	41.6351
rs12880641	G	T	G	T	-0.0138449	-0.0163	0.661581	0.6265	14	103251452	0.0124	0.188	2.4e-13	0.00188965	462166	14	103251452	0.0107733	53.6466
rs12926311	C	G	C	G	-0.0124576	-0.0113	0.353624	0.2954	16	406427	0.0132	0.3925	3.2e-11	0.00187714	462166	16	406427	0.00976243	44.0508
rs1296328	C	A	C	A	-0.0131912	-0.0113	0.559023	0.4819	4	137083193	0.012	0.3466	3.1e-13	0.00180908	462166	4	137083193	0.0107227	53.1436
rs12983532	T	C	T	C	-0.0149964	-0.0215	0.251127	0.2313	19	18467322	0.0143	0.1324	7.6e-13	0.00209191	462166	19	18467322	0.0105436	51.3829
rs13033310	A	G	A	G	0.0125512	-0.0247	0.25275	0.2402	2	133523605	0.014	0.07722	1.3e-09	0.00206781	462166	2	133523605	0.00892457	36.8133
rs13163306	A	G	A	G	-0.00988959	-0.012	0.466047	0.494	5	136571959	0.012	0.3185	3.5e-08	0.00179351	462166	5	136571959	0.00811119	30.4084
rs13182474	C	G	C	G	-0.0117225	0.0149	0.318883	0.2204	5	80861777	0.0144	0.3021	1e-09	0.00192056	462166	5	80861777	0.00898636	37.3249
rs1320903	A	G	A	G	0.017072	-0.0046	0.319725	0.2949	3	131758077	0.0132	0.7252	5.2e-19	0.00191652	462166	3	131758077	0.0131021	79.351
rs1321521	A	C	A	C	0.0141428	-0.0171	0.345235	0.4323	6	51771578	0.0121	0.1566	5.1e-14	0.00187867	462166	6	51771578	0.0110747	56.6907
rs13288841	A	G	A	G	0.0190501	0.0071	0.32166	0.3743	9	28418511	0.0124	0.569	2.2e-23	0.00191229	462166	9	28418511	0.0146545	99.273
rs13322435	G	A	G	A	-0.0169561	0.024	0.404446	0.3322	3	156795468	0.0127	0.0591998	1.9e-20	0.00182964	462166	3	156795468	0.0136313	85.8922
rs1336486	G	T	G	T	0.012489	0.0133	0.328585	0.4104	13	40784814	0.0122	0.2734	6e-11	0.00190819	462166	13	40784814	0.00962513	42.8203
rs13410783	G	A	G	A	0.0141058	0.0133	0.36952	0.3833	2	36789166	0.0124	0.2821	2.4e-14	0.0018498	462166	2	36789166	0.0112186	58.1735
rs1346841	A	G	A	G	-0.0106038	-0.0092	0.40501	0.3188	4	65651730	0.0129	0.4758	6.4e-09	0.00182614	462166	4	65651730	0.00854004	33.7091
rs1357079	C	T	C	T	0.011183	-0.0148	0.570076	0.5871	3	153691949	0.0122	0.2268	6.2e-10	0.00180784	462166	3	153691949	0.00909792	38.2575
rs1360201	T	C	T	C	0.00979421	0.0164	0.48157	0.5347	9	73796450	0.012	0.1734	4.4e-08	0.00178924	462166	9	73796450	0.00805179	29.9646
rs1436348	G	A	G	A	0.0124929	0.0091	0.582801	0.6338	3	104612668	0.0124	0.4639	5.4e-12	0.00181185	462166	3	104612668	0.0101412	47.5361
rs1441264	A	G	A	G	0.0150095	0.003	0.593703	0.6709	13	79580919	0.0128	0.8153	7.6e-16	0.00186203	462166	13	79580919	0.0118558	64.9713
rs145350287	A	T	A	T	-0.0322326	-0.0223	0.039615	0.03728	12	120907309	0.0319	0.4849	2e-12	0.00458244	462166	12	120907309	0.0103469	49.4841
rs1458156	T	C	T	C	0.0146036	0.0232	0.488413	0.4693	12	41887940	0.012	0.0536896	3.5e-16	0.00179105	462166	12	41887940	0.0119944	66.4993
rs1502317	T	C	T	C	-0.0173687	0.0034	0.276578	0.2646	11	8682018	0.0136	0.8026	4.3e-18	0.0020032	462166	11	8682018	0.012753	75.1785
rs1559900	T	C	T	C	0.0127734	-0.0187	0.286025	0.2541	8	14207321	0.0138	0.1743	1.1e-10	0.00197882	462166	8	14207321	0.00949101	41.6351
rs1570298	T	A	T	A	0.0120451	-0.0136	0.743189	0.767	6	70218298	0.0142	0.3366	3.8e-09	0.00204452	462166	6	70218298	0.00866758	34.7236
rs1582931	A	G	A	G	-0.0138548	0.001	0.473264	0.5125	5	122657199	0.012	0.9323	1.7e-14	0.00180588	462166	5	122657199	0.0112838	58.8521
rs1609010	G	A	G	A	0.0149337	-0.0135	0.565725	0.5295	8	77227464	0.012	0.2606	1.3e-16	0.00180594	462166	8	77227464	0.0121692	68.4523
rs1609303	A	T	A	T	0.0152662	0.0044	0.631343	0.6427	2	181567556	0.0125	0.725301	2.1e-16	0.00185779	462166	2	181567556	0.0120849	67.5065
rs1619442	C	T	C	T	-0.0162997	-0.0096	0.859489	0.8611	9	81348300	0.0174	0.58	2.4e-10	0.00257242	462166	9	81348300	0.00931562	40.1105
rs1625623	T	C	T	C	0.0107407	-0.0043	0.371988	0.3649	5	112301096	0.0125	0.7295	9.8e-09	0.00187307	462166	5	112301096	0.00843443	32.8805
rs1657930	A	G	A	G	-0.0142481	0.0124	0.802922	0.8467	15	57120989	0.0167	0.455	2.3e-10	0.00224816	462166	15	57120989	0.00932527	40.1936
rs1711171	C	T	C	T	0.0175635	-0.0245	0.749579	0.8467	3	136020541	0.0166	0.1405	1.8e-17	0.00206542	462166	3	136020541	0.0125111	72.3523
rs17296856	C	A	C	A	-0.0156228	0.0015	0.280671	0.3197	15	84557450	0.0128	0.9081	5e-15	0.00199629	462166	15	84557450	0.0115123	61.2604
rs1731246	T	G	T	G	-0.0118366	0.0094	0.757325	0.7589	2	26938216	0.0141	0.5055	1.3e-08	0.0020818	462166	2	26938216	0.0083637	32.3313
rs17446091	C	T	C	T	0.0149141	0.0049	0.20186	0.1441	8	27167942	0.017	0.7718	2.3e-11	0.00222979	462166	8	27167942	0.00983379	44.6972
rs1752169	A	C	A	C	0.0143082	-0.0116	0.250696	0.3768	9	126586563	0.0124	0.3462	4.5e-12	0.00206705	462166	9	126586563	0.0101793	47.8936
rs17681738	T	C	T	C	0.0105421	-0.019	0.328589	0.3179	17	9793240	0.0129	0.1405	3.3e-08	0.00190864	462166	17	9793240	0.0081264	30.5226
rs1834144	A	C	A	C	-0.0146152	-0.0091	0.373194	0.4464	18	40744790	0.0121	0.4507	3.4e-15	0.00185609	462166	18	40744790	0.0115835	62.0198
rs1942826	A	G	A	G	0.0167972	0.0169	0.12597	0.2277	18	63345799	0.0144	0.2416	4.9e-10	0.00270011	462166	18	63345799	0.00915235	38.7167
rs2020942	T	C	T	C	0.0108469	0.021	0.394892	0.4471	17	28546914	0.0121	0.0831802	3.4e-09	0.00183573	462166	17	28546914	0.00869456	34.9401
rs2074881	T	C	T	C	-0.0147612	-0.0331	0.168487	0.132	19	1970021	0.0178	0.0633301	8e-10	0.00240193	462166	19	1970021	0.0090386	37.7601
rs2133561	T	A	T	A	-0.0122441	-0.0115	0.611063	0.6376	5	139086651	0.0125	0.3583	3.9e-11	0.00185284	462166	5	139086651	0.0097194	43.6632
rs215669	A	G	A	G	-0.0125095	-0.0208	0.611654	0.7162	7	32378979	0.0133	0.1193	1.1e-11	0.00184246	462166	7	32378979	0.00999142	46.1417
rs2161097	T	C	T	C	0.0142773	0.0064	0.437804	0.3893	5	103945178	0.0123	0.604399	2.2e-15	0.00180004	462166	5	103945178	0.0116632	62.8773
rs2172131	C	T	C	T	-0.0121742	-0.0062	0.578709	0.5141	10	133978962	0.012	0.6065	1.9e-11	0.00181299	462166	10	133978962	0.00987482	45.071
rs2180454	C	T	C	T	0.0179823	0.0106	0.771831	0.6704	14	29690513	0.0128	0.4084	3.7e-17	0.00213539	462166	14	29690513	0.0123876	70.9307
rs2225909	C	T	C	T	0.015797	-0.0109	0.774104	0.8191	11	30329744	0.0155	0.4825	1.4e-13	0.00213642	462166	11	30329744	0.0108791	54.7058
rs2302209	T	C	T	C	0.0198329	-0.0161	0.288806	0.2558	19	18324329	0.0137	0.2403	1.1e-23	0.00197713	462166	19	18324329	0.0147554	100.646
rs2306593	T	C	T	C	-0.0152919	-0.0149	0.488298	0.5032	17	34866546	0.012	0.2148	1.6e-17	0.00179509	462166	17	34866546	0.0125312	72.585
rs2307111	C	T	C	T	-0.0239722	0.0224	0.394972	0.4265	5	75003678	0.0121	0.0651899	3.3e-39	0.0018299	462166	5	75003678	0.0192658	171.606
rs2376885	A	G	A	G	-0.0106223	-0.0036	0.324117	0.3983	16	89826901	0.0123	0.768799	2.8e-08	0.00191252	462166	16	89826901	0.00816873	30.8414
rs2439823	G	A	G	A	0.0155254	0.0234	0.545601	0.4894	10	99778226	0.012	0.0523396	6.8e-18	0.00180145	462166	10	99778226	0.0126761	74.2738
rs245767	G	A	G	A	0.0145976	0.0064	0.730365	0.6759	5	170525393	0.0128	0.6159	4.5e-13	0.00201635	462166	5	170525393	0.0106486	52.4119
rs2470549	C	T	C	T	-0.0119541	-0.0166	0.598143	0.6212	3	15737698	0.0123	0.1779	5.2e-11	0.00182105	462166	3	15737698	0.00965657	43.1005
rs2482704	T	G	T	G	-0.0115642	0.0053	0.426761	0.3773	9	94182363	0.0124	0.668399	1.5e-10	0.00180618	462166	9	94182363	0.00942166	41.0288
rs2568958	A	G	A	G	0.0169206	0.0189	0.603683	0.6463	1	72765116	0.0126	0.1319	1.6e-20	0.00182184	462166	1	72765116	0.0136583	86.2323
rs2584205	A	G	A	G	0.0111592	0.0237	0.733265	0.7509	18	2702259	0.0138	0.0869201	3.7e-08	0.00202662	462166	18	2702259	0.00809681	30.3007
rs2678204	G	T	G	T	0.0157074	0.0029	0.34017	0.2962	1	201800511	0.0132	0.8247	7.9e-17	0.00188488	462166	1	201800511	0.0122562	69.4345
rs2696309	C	T	C	T	0.0112571	-0.0035	0.720419	0.6665	10	36227101	0.0127	0.7824	1.6e-08	0.00199327	462166	10	36227101	0.00831136	31.9279
rs2725371	G	A	G	A	-0.0154452	-0.0089	0.696098	0.7386	8	30854033	0.0136	0.5163	2.6e-15	0.00195255	462166	8	30854033	0.0116327	62.5481
rs28350	G	A	G	A	-0.0139376	-0.0108	0.820658	0.8138	3	42418446	0.0154	0.481	2.5e-09	0.0023374	462166	3	42418446	0.00876875	35.539
rs28366156	C	T	C	T	-0.0187659	0.0212	0.130582	0.07095	6	31671498	0.0233	0.3616	1.5e-12	0.00265145	462166	6	31671498	0.0104057	50.0484
rs28375268	T	G	T	G	-0.0130789	-0.007	0.645058	0.6542	16	4949528	0.0126	0.5776	3.3e-12	0.00187766	462166	16	4949528	0.0102437	48.5018
rs28489620	A	G	A	G	-0.0124131	-0.0083	0.29035	0.2967	22	41804716	0.0131	0.5282	4.4e-10	0.00198899	462166	22	41804716	0.00917715	38.9268
rs28580375	G	C	G	C	0.0126069	0.0042	0.21874	0.231	8	103544717	0.0142	0.770501	6e-09	0.00216777	462166	8	103544717	0.00855593	33.8347
rs2861692	C	T	C	T	-0.0166517	0.0049	0.275371	0.2886	2	67838719	0.0132	0.710901	7.7e-17	0.00199772	462166	2	67838719	0.0122607	69.4849
rs2903738	T	A	T	A	-0.0133061	-0.0007	0.221402	0.2388	19	32946043	0.0141	0.9615	6.8e-10	0.00215663	462166	19	32946043	0.00907646	38.0772
rs3087523	A	G	A	G	0.016586	-0.0058	0.124704	0.09742	2	105977776	0.0204	0.774901	1e-09	0.00271786	462166	2	105977776	0.00898636	37.3249
rs308911	G	A	G	A	-0.0114749	0.0126	0.714436	0.7229	2	86855977	0.0134	0.3478	6.9e-09	0.00198055	462166	2	86855977	0.00852148	33.5628
rs3113509	T	C	T	C	-0.0123292	-0.0219	0.731966	0.7178	4	52932825	0.0134	0.1005	1e-09	0.00201975	462166	4	52932825	0.00898636	37.3249
rs319775	C	T	C	T	0.0101556	0.014	0.608753	0.5955	17	31495076	0.0123	0.2523	3e-08	0.0018335	462166	17	31495076	0.00815098	30.7075
rs3212038	G	A	G	A	0.0126546	0.0062	0.328517	0.4144	14	104178186	0.0122	0.6137	3.5e-11	0.00191072	462166	14	104178186	0.00974294	43.875
rs34045288	T	C	T	C	0.0203746	0.0214	0.334413	0.3767	6	40369081	0.0124	0.0835391	5.8e-27	0.00189485	462166	6	40369081	0.0158138	115.605
rs34140906	C	T	C	T	-0.0179391	-0.0193	0.17033	0.1969	13	58480400	0.0151	0.2013	5.4e-14	0.00238486	462166	13	58480400	0.0110637	56.5784
rs34234296	A	G	A	G	-0.0131214	-0.0136	0.392393	0.3066	2	175166636	0.0131	0.2996	1.3e-12	0.00184833	462166	2	175166636	0.0104349	50.3294
rs34483452	A	C	A	C	0.0270483	0.0183	0.136355	0.121	5	87986314	0.0184	0.3205	7.3e-25	0.0026269	462166	5	87986314	0.0151442	106.02
rs34882821	T	G	T	G	0.0106237	0.0021	0.338577	0.2925	9	14783314	0.0132	0.8762	2.1e-08	0.00189644	462166	9	14783314	0.00824234	31.3998
rs34994596	C	T	C	T	-0.014559	-0.0252	0.297289	0.2667	15	80991447	0.0136	0.0637999	1.1e-13	0.00195866	462166	15	80991447	0.0109261	55.1796
rs35023999	C	A	C	A	-0.0113409	-0.0151	0.508297	0.482	11	113266411	0.012	0.2093	2.4e-10	0.00178977	462166	11	113266411	0.00931562	40.1105
rs35216639	A	C	A	C	0.0168196	-0.0148	0.110699	0.08181	1	174572982	0.0219	0.4992	3.3e-09	0.00284261	462166	1	174572982	0.0087018	34.9983
rs35243581	T	C	T	C	0.0173643	0.0126	0.317318	0.3113	11	43707364	0.0129	0.331	1.7e-19	0.00192251	462166	11	43707364	0.0132832	81.5605
rs35681682	C	T	C	T	-0.0101534	-0.0131	0.407729	0.4362	2	69678079	0.0121	0.2763	1e-08	0.00177268	462166	2	69678079	0.00842939	32.8413
rs35882248	T	C	T	C	0.0157088	0.0025	0.317213	0.3155	2	230627955	0.0129	0.8465	2.8e-16	0.00191956	462166	2	230627955	0.012034	66.9391
rs36007635	A	G	A	G	-0.0165685	0.0109	0.137694	0.09104	6	163009335	0.0208	0.5991	1.7e-10	0.00259543	462166	6	163009335	0.00939353	40.7842
rs36061954	T	C	T	C	0.0114574	-0.0085	0.39881	0.3878	8	38329650	0.0123	0.488	3.6e-10	0.00182669	462166	8	38329650	0.00922322	39.3186
rs36165342	C	T	C	T	0.0107118	-0.0224	0.478618	0.4073	12	122530256	0.0122	0.0669006	2.1e-09	0.00178943	462166	12	122530256	0.00881055	35.8786
rs3764002	T	C	T	C	-0.0160772	-0.0225	0.261552	0.3435	12	108618630	0.0126	0.0746294	2.8e-15	0.00203505	462166	12	108618630	0.0116191	62.4021
rs3768321	T	G	T	G	0.0176726	0.0006	0.196525	0.1647	1	40035928	0.0162	0.9689	3.8e-15	0.00224849	462166	1	40035928	0.011563	61.8008
rs3784692	T	C	T	C	0.0185824	0.0152	0.601752	0.6441	15	67988133	0.0125	0.2234	2.6e-24	0.00182662	462166	15	67988133	0.0149634	103.503
rs3806114	A	G	A	G	-0.0108144	0.0065	0.668366	0.7524	6	20482335	0.014	0.6411	1.8e-08	0.00192005	462166	6	20482335	0.00828154	31.6992
rs3807566	T	G	T	G	-0.012149	0.0086	0.438304	0.3784	7	50564204	0.0124	0.4887	1.7e-11	0.00180583	462166	7	50564204	0.0098987	45.2892
rs3814883	T	C	T	C	0.0239816	0.0004	0.482382	0.4119	16	29994922	0.0122	0.9737	1.1e-40	0.00179535	462166	16	29994922	0.0196417	178.37
rs3816760	A	G	A	G	0.0133538	0.0079	0.307437	0.2623	12	133405069	0.0136	0.5612	5.7e-12	0.00193927	462166	12	133405069	0.0101299	47.43
rs3845344	T	C	T	C	0.0107371	0.0208	0.391147	0.4316	1	75001480	0.0121	0.0864709	4.3e-09	0.00182845	462166	1	75001480	0.0086375	34.4829
rs3866805	A	C	A	C	0.010421	-0.0025	0.355681	0.3393	1	6657424	0.0127	0.8428	2.5e-08	0.00187021	462166	1	6657424	0.0081978	31.0614
rs3935190	A	G	A	G	-0.0126195	-0.0013	0.536793	0.5045	17	79084367	0.012	0.9128	2.8e-12	0.00180625	462166	17	79084367	0.0102777	48.8238
rs3936510	T	G	T	G	0.0137147	0.0131	0.201255	0.1391	5	55860866	0.0174	0.4524	7.3e-10	0.0022268	462166	5	55860866	0.00905995	37.9388
rs400031	G	A	G	A	0.012086	-0.0018	0.756094	0.1715	5	742139	0.0162	0.9125	2.1e-08	0.00215599	462166	5	741999	0.00824234	31.3998
rs40067	A	G	A	G	-0.0156125	-0.0042	0.170153	0.2095	5	107439012	0.0147	0.7756	6.1e-11	0.00238663	462166	5	107439012	0.00962154	42.7883
rs4017425	T	C	T	C	-0.0101269	-0.02	0.47017	0.3872	3	44028764	0.0123	0.1046	1.6e-08	0.00179274	462166	3	44028764	0.00831136	31.9279
rs4072917	A	G	A	G	0.0117189	0.0161	0.474253	0.4393	8	143300279	0.0121	0.1835	7.4e-11	0.0017994	462166	8	143300279	0.00957896	42.4104
rs4075353	A	G	A	G	-0.0105885	-0.019	0.344101	0.3555	10	102415609	0.0126	0.1301	2.2e-08	0.00189213	462166	10	102415609	0.00823048	31.3095
rs4148155	G	A	G	A	-0.0189755	-0.0273	0.113256	0.0747	4	89054667	0.0229	0.2334	1.5e-11	0.00281242	462166	4	89054667	0.00992542	45.5341
rs4290163	T	G	T	G	0.0113777	0.0027	0.392697	0.3884	10	104610926	0.0123	0.8284	5.4e-10	0.00183305	462166	10	104610926	0.00912992	38.5271
rs429343	G	A	G	A	-0.0124509	-0.0099	0.576576	0.5311	2	147903382	0.012	0.4124	5.9e-12	0.00180931	462166	2	147903382	0.0101227	47.3623
rs4344019	G	A	G	A	0.0200862	0.0393	0.91694	0.9129	7	114588540	0.0213	0.0658901	5.7e-10	0.00324046	462166	7	114588540	0.00911741	38.4216
rs4456769	T	C	T	C	0.0134001	-0.0066	0.333423	0.3439	20	25190777	0.0126	0.6006	1.8e-12	0.0019003	462166	20	25190777	0.0103685	49.6905
rs4469245	T	A	T	A	-0.0115211	-0.0044	0.662728	0.7005	5	153210953	0.0131	0.734401	1.1e-09	0.00189126	462166	5	153210953	0.00896396	37.139
rs4482463	A	C	A	C	-0.0258908	-0.0232	0.923005	0.9401	2	205375909	0.0253	0.3585	1.3e-14	0.00335821	462166	2	205375909	0.0113343	59.3799
rs4525978	T	C	T	C	-0.0113759	0.0043	0.734555	0.7745	4	102133144	0.0143	0.7618	2.1e-08	0.00203018	462166	4	102133144	0.00824234	31.3998
rs4527444	G	A	G	A	0.0105243	0.0056	0.541317	0.514	4	30842780	0.012	0.6401	4.5e-09	0.00179433	462166	4	30842780	0.00862641	34.3945
rs4552632	A	G	A	G	-0.0101695	-0.003	0.616568	0.6607	5	164574688	0.0127	0.8138	3.3e-08	0.00184128	462166	5	164574688	0.0081264	30.5226
rs4689465	C	T	C	T	-0.0108689	-0.0118	0.525445	0.5006	4	6490789	0.012	0.3238	1.3e-09	0.00178976	462166	4	6490789	0.00892457	36.8133
rs4706004	G	A	G	A	-0.0134593	0.0102	0.217047	0.2633	5	130391918	0.0136	0.453799	5.4e-10	0.00216831	462166	5	130391918	0.00912992	38.5271
rs4718964	T	G	T	G	0.0122483	-0.007	0.413175	0.41	7	70038969	0.0122	0.564901	1.8e-11	0.00182202	462166	7	70038969	0.00988642	45.177
rs4722398	T	C	T	C	0.0168104	0.02	0.136117	0.07008	7	3125220	0.0235	0.3963	1e-10	0.00260196	462166	7	3125220	0.00951222	41.8215
rs4742782	G	C	G	C	0.0124912	0.0034	0.315942	0.3887	9	103089143	0.0123	0.781	8e-11	0.00192172	462166	9	103089143	0.00956171	42.2578
rs484455	A	G	A	G	-0.0115336	-0.0087	0.481363	0.6151	13	109835686	0.0123	0.4813	1.4e-10	0.00179638	462166	13	109835686	0.00943712	41.1637
rs4851283	G	C	G	C	-0.0173961	-0.019	0.684805	0.7811	2	100894802	0.0145	0.1906	2.5e-19	0.00193525	462166	2	100894802	0.013221	80.7983
rs4876611	G	A	G	A	0.0150085	-0.0006	0.720239	0.6908	8	116671848	0.013	0.9612	5.3e-14	0.0019947	462166	8	116671848	0.0110673	56.6151
rs4900715	A	G	A	G	-0.0114279	0.0137	0.507101	0.5853	14	47306418	0.0122	0.2609	1.9e-10	0.00179331	462166	14	47306418	0.00936847	40.5669
rs4908672	T	C	T	C	0.0113966	0.0142	0.393063	0.4392	1	7725414	0.0121	0.2393	4.7e-10	0.00183009	462166	1	7725414	0.00916196	38.798
rs520478	T	G	T	G	-0.0125051	-0.0172	0.701359	0.7665	6	124897878	0.0142	0.2261	2.3e-10	0.00197262	462166	6	124897878	0.00932527	40.1936
rs539515	C	A	C	A	0.0378223	0.0164	0.204929	0.1779	1	177889025	0.0157	0.2965	1.5e-65	0.00221181	462166	1	177889025	0.0251446	292.389
rs55726687	A	G	A	G	0.0199369	0.0113	0.209735	0.2143	12	991306	0.0146	0.4395	1.1e-19	0.00219529	462166	12	991306	0.0133531	82.4206
rs55794894	A	G	A	G	-0.014525	0.0005	0.135429	0.1391	7	133516821	0.0174	0.977	2.8e-08	0.00261481	462166	7	133516821	0.00816873	30.8414
rs557951	G	T	G	T	0.0120789	0.0099	0.312953	0.2651	3	62713263	0.0136	0.4647	4e-10	0.00193163	462166	3	62713263	0.00919906	39.1129
rs559231	T	G	T	G	0.0107518	0.0221	0.393054	0.4233	18	39644247	0.0121	0.0686199	5.2e-09	0.00184107	462166	18	39644247	0.00859106	34.1131
rs56803094	G	A	G	A	-0.0127745	-0.0138	0.226708	0.2783	15	99222509	0.0135	0.3062	2.6e-09	0.00214599	462166	15	99222509	0.00875932	35.4626
rs57636386	C	T	C	T	-0.0309067	-0.0332	0.083822	0.05026	18	58048295	0.0277	0.2302	1.5e-21	0.00324088	462166	18	58048295	0.0140241	90.9147
rs587271	T	C	T	C	0.0118054	0.0123	0.686869	0.6767	1	54743111	0.013	0.3471	4.1e-09	0.0020079	462166	1	54743111	0.0086491	34.5757
rs58862095	T	C	T	C	-0.0165812	-0.0105	0.419271	0.515	7	75081418	0.012	0.3803	7.1e-20	0.00181678	462166	7	75081418	0.013423	83.2858
rs588660	A	G	A	G	0.0155276	0.012	0.584119	0.5999	1	96886604	0.0122	0.3278	1e-17	0.00181174	462166	1	96886604	0.012611	73.5125
rs59068084	T	G	T	G	0.0101403	0.0206	0.410212	0.3918	4	113256737	0.0123	0.0944909	2.5e-08	0.00181938	462166	4	113256737	0.0081978	31.0614
rs59104534	T	C	T	C	0.0107189	0.0063	0.298501	0.3251	8	25666169	0.0128	0.6216	4.7e-08	0.00196197	462166	8	25666169	0.00803459	29.8367
rs6030803	C	T	C	T	-0.0176808	0.0068	0.126588	0.09987	20	41986507	0.02	0.7338	6.1e-11	0.00270327	462166	20	41986507	0.00962154	42.7883
rs6069037	A	C	A	C	-0.011125	-0.005	0.731389	0.757	20	53503198	0.014	0.722199	3.6e-08	0.00202001	462166	20	53503198	0.0081039	30.3538
rs61223906	A	G	A	G	-0.0108726	-0.0079	0.339313	0.3685	7	39447726	0.0124	0.5253	8.3e-09	0.00188655	462166	7	39447726	0.00847575	33.2035
rs61813324	T	C	T	C	0.0219762	0.0038	0.135713	0.1576	1	156049877	0.0167	0.8184	9.5e-17	0.00264443	462166	1	156049877	0.0122241	69.0707
rs61903695	G	A	G	A	0.0134514	0.0029	0.254942	0.2466	11	89922417	0.014	0.8361	5.9e-11	0.00205497	462166	11	89922417	0.00962882	42.8532
rs61992671	G	A	G	A	-0.0130005	0.0068	0.491969	0.513	14	101531854	0.0122	0.579499	3.8e-12	0.00187164	462166	14	101531854	0.0102145	48.225
rs62072003	T	C	T	C	0.0144325	0.0283	0.143328	0.1205	17	52936314	0.0184	0.1244	1.8e-08	0.00256295	462166	17	52936314	0.00828154	31.6992
rs62243489	G	T	G	T	-0.0155648	-0.01	0.259239	0.2939	3	62482927	0.0132	0.4509	3e-14	0.00204876	462166	3	62482927	0.0111762	57.7346
rs62246311	A	G	A	G	0.0204929	-0.0039	0.102338	0.06368	3	9498143	0.0246	0.8751	3.5e-12	0.00294652	462166	3	9498143	0.0102315	48.3862
rs62261725	G	A	G	A	-0.0148698	-0.0156	0.326101	0.3627	3	85898626	0.0125	0.212	6.7e-15	0.00190872	462166	3	85898626	0.0114581	60.6843
rs6493498	C	T	C	T	-0.013082	-0.0088	0.54539	0.5946	15	51754451	0.0122	0.4701	4.2e-13	0.001805	462166	15	51754451	0.0106624	52.5476
rs649458	A	T	A	T	-0.018179	0.022	0.860102	0.8844	1	23712528	0.0189	0.2426	1.5e-12	0.00256951	462166	1	23712528	0.0104057	50.0484
rs6551304	G	A	G	A	0.016827	0.0047	0.831916	0.8605	3	88306596	0.0173	0.7865	2.1e-12	0.00239416	462166	3	88306596	0.0103369	49.3883
rs6567160	C	T	C	T	0.0451644	0.0277	0.232725	0.1841	18	57829135	0.0154	0.0726608	7.19e-101	0.00211824	462166	18	57829135	0.0313475	454.6
rs6575340	A	G	A	G	0.0161584	0.0013	0.636022	0.6274	14	94023972	0.0124	0.915	4.6e-18	0.00186502	462166	14	94023972	0.0127417	75.0453
rs6669341	G	A	G	A	-0.0125214	-0.0029	0.58271	0.6179	1	47678458	0.0123	0.8122	4.5e-12	0.0018097	462166	1	47678458	0.0101793	47.8936
rs6682438	C	T	C	T	0.0124771	-0.0042	0.673097	0.6652	1	33784146	0.0127	0.7408	5.4e-11	0.00190203	462166	1	33784146	0.00964829	43.0266
rs6739755	G	A	G	A	-0.0159241	-0.0155	0.603358	0.5965	2	59330227	0.0122	0.2034	3.1e-18	0.00182885	462166	2	59330227	0.0128077	75.8245
rs67609008	C	T	C	T	0.011102	-0.0193	0.283612	0.1825	10	126640936	0.0156	0.2148	2.5e-08	0.00199233	462166	10	126640936	0.0081978	31.0614
rs67632512	A	C	A	C	0.0165927	0.0069	0.117046	0.154	5	92251840	0.0169	0.6818	3.8e-09	0.00281561	462166	5	92251840	0.00866758	34.7236
rs6791983	A	C	A	C	0.0123148	0.0175	0.750006	0.7692	3	25111890	0.0142	0.2185	2.3e-09	0.00205988	462166	3	25111890	0.00878876	35.7014
rs6799080	A	G	A	G	0.0102307	0.0068	0.353391	0.4439	3	81905591	0.0121	0.5713	4.3e-08	0.00186721	462166	3	81905591	0.00805777	30.0092
rs6846041	G	C	G	C	0.0123073	0.0147	0.320508	0.2561	4	18477030	0.0137	0.2828	1.3e-10	0.00191467	462166	4	18477030	0.00945371	41.3086
rs6849518	T	C	T	C	0.0218636	-0.015	0.12428	0.1674	4	20120274	0.016	0.3497	7.1e-16	0.00270973	462166	4	20120274	0.011868	65.1051
rs6938973	C	T	C	T	0.0120106	0.003	0.601488	0.6774	6	98421721	0.0128	0.8157	4.9e-11	0.001827	462166	6	98421721	0.00966958	43.2167
rs703984	C	G	C	G	-0.011472	-0.0148	0.414809	0.3828	10	80941417	0.0123	0.2286	2.9e-10	0.00181967	462166	10	80941417	0.0092726	39.7408
rs704061	C	T	C	T	0.0146223	0.0003	0.455057	0.3764	12	89771903	0.0124	0.9801	4e-16	0.00179659	462166	12	89771903	0.0119707	66.236
rs7070670	T	C	T	C	-0.0120318	-0.0114	0.327941	0.2814	10	61842645	0.0134	0.3946	3.5e-10	0.00191737	462166	10	61842645	0.00922966	39.3736
rs7115013	T	C	T	C	-0.0106394	0.0025	0.442738	0.4021	11	43934592	0.0122	0.836	3.7e-09	0.00180461	462166	11	43934592	0.00867406	34.7755
rs7132908	A	G	A	G	0.0215129	0.0222	0.384454	0.3839	12	50263148	0.0124	0.07305	1.4e-31	0.00183998	462166	12	50263148	0.017196	136.704
rs71495038	A	G	A	G	0.0223778	0.0027	0.076924	0.09497	10	33971383	0.0206	0.8975	2.6e-11	0.00335663	462166	10	33971383	0.00980733	44.4569
rs7169847	T	G	T	G	-0.0102703	0.0159	0.635678	0.5157	15	95272920	0.012	0.1854	3.8e-08	0.00186771	462166	15	95272920	0.00808989	30.2489
rs7171864	A	G	A	G	0.0128894	0.0132	0.660202	0.7032	15	73227249	0.0132	0.3152	1.1e-11	0.00189898	462166	15	73227249	0.00999142	46.1417
rs7206608	G	C	G	C	0.0120004	0.0162	0.321623	0.3526	16	82872628	0.0125	0.1972	3.8e-10	0.00191641	462166	16	82872628	0.00921083	39.213
rs7218014	C	T	C	T	0.0224089	0.024	0.197315	0.2393	17	65832016	0.0141	0.0886298	2.7e-23	0.00225393	462166	17	65832016	0.0146245	98.8671
rs7259070	C	T	C	T	0.0153811	0.0102	0.596078	0.5623	19	47562509	0.0121	0.4022	6.6e-17	0.00184133	462166	19	47562509	0.0122875	69.7892
rs72617140	C	A	C	A	0.0152073	0.0172	0.213903	0.1953	2	229021373	0.0152	0.2571	3e-12	0.00217889	462166	2	229019109	0.0102634	48.6887
rs72618637	A	T	A	T	-0.0129811	0.0097	0.189431	0.2241	2	48953979	0.0145	0.5054	2.1e-08	0.00231667	462166	2	48953979	0.00824234	31.3998
rs72634826	A	G	A	G	-0.0148957	-0.0052	0.259865	0.2241	1	1601052	0.0148	0.7275	5.4e-13	0.00206456	462166	1	1601052	0.0106122	52.0538
rs72892910	T	G	T	G	0.0301404	0.0098	0.172259	0.2029	6	50816887	0.0149	0.512	5.2e-37	0.00237148	462166	6	50816887	0.0186928	161.545
rs72976986	A	G	A	G	-0.0157587	0.0045	0.190131	0.1578	19	4050424	0.0165	0.7862	7.8e-12	0.00230334	462166	19	4050424	0.0100641	46.8153
rs73052033	C	T	C	T	-0.0210096	-0.0023	0.184916	0.1617	3	185828465	0.0163	0.8868	7.9e-20	0.00230513	462166	3	185828465	0.013406	83.0751
rs73068448	T	C	T	C	-0.0153436	-0.0161	0.170691	0.1288	7	26385763	0.0179	0.3685	2e-10	0.00241309	462166	7	26385763	0.00935689	40.4667
rs73142879	T	C	T	C	-0.0241942	0.0015	0.192309	0.1581	20	51195932	0.0164	0.9273	2.8e-26	0.00228107	462166	20	51195932	0.0155989	112.483
rs7324067	C	T	C	T	0.0121297	0.0145	0.761254	0.7296	13	65484906	0.0135	0.2815	7.7e-09	0.00210064	462166	13	65484906	0.00849436	33.3494
rs735033	G	A	G	A	-0.0102658	0.0147	0.605139	0.5477	12	97550852	0.0121	0.2219	2.5e-08	0.00184312	462166	12	97550852	0.0081978	31.0614
rs7372674	A	C	A	C	0.0118947	0.021	0.357239	0.3054	3	196149165	0.0131	0.107	1.7e-10	0.00186339	462166	3	196149165	0.00939353	40.7842
rs7377083	A	C	A	C	0.0143396	0.0021	0.431061	0.4669	4	102708997	0.0121	0.8625	3.2e-15	0.00181913	462166	4	102708997	0.0115946	62.1395
rs73985439	C	A	C	A	0.0124046	-0.0147	0.307294	0.3025	2	212299249	0.0131	0.2607	1.6e-10	0.00193905	462166	2	212299249	0.00940716	40.9027
rs74395133	C	T	C	T	-0.0162995	-0.0187	0.133535	0.1257	3	61163455	0.0182	0.3038	6.6e-10	0.00263949	462166	3	61163455	0.0090834	38.1355
rs7442885	G	C	G	C	-0.0204724	-0.0195	0.214033	0.1864	5	87682877	0.0154	0.2065	6.8e-21	0.00218339	462166	5	87682877	0.0137916	87.9246
rs7498044	A	G	A	G	-0.0151498	0.0013	0.217312	0.2523	15	92573639	0.0138	0.9244	4.9e-12	0.00219298	462166	15	92573639	0.0101615	47.7266
rs7498665	G	A	G	A	0.026616	0.0213	0.399688	0.4127	16	28883241	0.0122	0.0799503	4.9e-48	0.00182769	462166	16	28883241	0.0214153	212.052
rs75035127	G	A	G	A	-0.0333436	0.005	0.030399	0.01305	1	174973726	0.0523	0.9244	1.5e-10	0.0052036	462166	1	174973726	0.00942166	41.0288
rs7519259	A	G	A	G	0.0126703	0.0068	0.528392	0.5661	1	66434743	0.0121	0.573499	1.7e-12	0.00179634	462166	1	66434743	0.0103802	49.803
rs7537581	A	C	A	C	0.0107362	0.0074	0.531758	0.5533	1	2725475	0.0121	0.5389	2.6e-09	0.00180248	462166	1	2725475	0.00875932	35.4626
rs7539903	A	T	A	T	-0.0107184	-0.0118	0.615583	0.5944	1	209208033	0.0122	0.336	5.3e-09	0.00183572	462166	1	209208033	0.00858639	34.076
rs756717	A	G	A	G	-0.0107152	-0.0144	0.399071	0.408	16	72996162	0.0123	0.2424	6.8e-09	0.00184896	462166	16	72996162	0.00852509	33.5912
rs76040172	A	G	A	G	-0.0294934	-0.0107	0.053933	0.08163	21	46488959	0.022	0.628001	1.5e-13	0.00399143	462166	21	46488959	0.0108656	54.5701
rs76286777	C	T	C	T	0.0234759	-0.023	0.217783	0.1355	2	25195577	0.0175	0.1874	1.8e-27	0.0021623	462166	2	25195577	0.0159717	117.926
rs7630382	T	C	T	C	0.013362	-0.0218	0.531552	0.4396	3	85111108	0.012	0.0707099	9.3e-14	0.00179336	462166	3	85111108	0.0109587	55.5096
rs765876	G	A	G	A	-0.00980862	0.0045	0.489495	0.5794	6	143185891	0.0122	0.709	4.1e-08	0.00178785	462166	6	143185891	0.00807017	30.1016
rs76895963	G	T	G	T	0.0484187	-0.0219	0.020689	0.03113	12	4384844	0.0361	0.5429	2.8e-12	0.00693063	462166	12	4384844	0.0102777	48.8238
rs7708584	G	A	G	A	-0.0121976	-0.0138	0.572375	0.5904	5	153543466	0.0122	0.2583	1.4e-11	0.00180534	462166	5	153543466	0.00994016	45.6694
rs77165542	T	C	T	C	-0.0700663	-0.0371	0.035495	0.01736	2	430975	0.0459	0.4185	9.9e-47	0.00488088	462166	2	430975	0.0211111	206.069
rs7752202	T	C	T	C	0.0177008	0.0137	0.145139	0.1054	6	33389603	0.0194	0.4796	2.7e-12	0.00253183	462166	6	33389603	0.0102852	48.8951
rs784257	C	T	C	T	0.0161785	0.0169	0.812569	0.8295	18	53397199	0.016	0.2897	2.3e-12	0.00230615	462166	18	53397199	0.0103182	49.2099
rs7933085	G	A	G	A	0.0108889	0.0133	0.507544	0.5041	11	130811527	0.012	0.2692	1.4e-09	0.00179888	462166	11	130796248	0.00890704	36.6688
rs7966251	A	G	A	G	-0.0115986	0.0035	0.255065	0.2806	12	103731395	0.0134	0.7921	1.7e-08	0.00205522	462166	12	103731395	0.00829602	31.8102
rs8024137	T	A	T	A	0.0136852	0.0259	0.848193	0.9333	15	35837297	0.0239	0.2785	4.6e-08	0.00250296	462166	15	35837297	0.0080402	29.8784
rs80243702	A	G	A	G	0.0151663	0.0175	0.160621	0.09597	15	53163603	0.0204	0.3895	6.7e-10	0.00245648	462166	15	53163603	0.00907991	38.1061
rs8078135	T	C	T	C	-0.0101458	0.0001	0.489933	0.5093	17	21268583	0.012	0.991	1.6e-08	0.00179655	462166	17	21268583	0.00831136	31.9279
rs8097672	T	A	T	A	0.0167802	0.0158	0.145231	0.173	18	1839601	0.0158	0.3146	5e-11	0.00255407	462166	18	1839601	0.00966514	43.1771
rs815163	C	T	C	T	-0.0131383	-0.0123	0.563195	0.4723	1	190294726	0.012	0.3078	2.7e-13	0.00179812	462166	1	190294726	0.01075	53.415
rs8192675	C	T	C	T	0.0159923	-0.001	0.288645	0.2636	3	170724883	0.0136	0.9404	4.5e-16	0.00196858	462166	3	170724883	0.0119497	66.0041
rs852042	G	A	G	A	-0.0115951	-0.0189	0.758579	0.7659	20	17091233	0.0141	0.1804	3e-08	0.00209164	462166	20	17091233	0.00815098	30.7075
rs852983	A	G	A	G	-0.00983151	0.002	0.459562	0.4936	5	142712064	0.012	0.8674	4.2e-08	0.00179325	462166	5	142712064	0.0080639	30.0548
rs862227	G	A	G	A	-0.0109798	-0.006	0.457951	0.4393	16	73602926	0.0121	0.6179	8.8e-10	0.00179141	462166	16	73602926	0.00901632	37.5742
rs862320	T	C	T	C	-0.0180264	-0.0182	0.409625	0.4309	16	69651866	0.0121	0.1322	4.4e-23	0.0018218	462166	16	69651866	0.0145528	97.9
rs876605	G	A	G	A	-0.0111634	-0.0203	0.739809	0.7413	5	77801359	0.0137	0.139	4.2e-08	0.00203598	462166	5	77801359	0.0080639	30.0548
rs879620	T	C	T	C	0.0194431	0.0223	0.613194	0.579	16	4015729	0.0122	0.0678297	4.9e-26	0.00184223	462166	16	4015729	0.0155218	111.374
rs883403	C	T	C	T	-0.0176676	-0.0133	0.154427	0.2232	7	99047978	0.0144	0.3544	9.5e-13	0.00247511	462166	7	99047978	0.0104985	50.9449
rs894736	G	A	G	A	0.0157371	-0.0104	0.362765	0.4885	12	54418166	0.012	0.3881	3.6e-17	0.00186806	462166	12	54418166	0.0123923	70.9847
rs923994	G	A	G	A	-0.0130094	-0.0222	0.783206	0.778	4	67802992	0.0145	0.1244	2.2e-09	0.0021745	462166	4	67802992	0.00879942	35.788
rs9289630	C	G	C	G	0.0144758	0.0188	0.389039	0.3114	3	141178670	0.0129	0.1448	3.5e-15	0.00183898	462166	3	141178670	0.0115781	61.9627
rs9294260	A	G	A	G	0.0131781	0.0033	0.476584	0.5074	6	83433228	0.012	0.785199	2.4e-13	0.00179925	462166	6	83433228	0.0107733	53.6466
rs9308964	T	C	T	C	-0.0099592	-0.007	0.565114	0.6119	2	35437757	0.0123	0.5659	3.5e-08	0.00180578	462166	2	35436262	0.00811119	30.4084
rs9316661	C	T	C	T	-0.0156101	-0.0017	0.801292	0.8059	13	54354615	0.0151	0.9103	3.8e-12	0.00224739	462166	13	54354615	0.0102145	48.225
rs9370243	T	G	T	G	0.0195525	0.0197	0.082226	0.1016	6	53789830	0.0199	0.3222	1.9e-09	0.00325673	462166	6	53789830	0.00883446	36.0737
rs9378676	C	A	C	A	0.0130316	-0.0041	0.234005	0.3023	6	2064264	0.0131	0.7554	7e-10	0.00211353	462166	6	2064264	0.00906972	38.0206
rs9478496	C	T	C	T	0.0145491	-0.0181	0.164212	0.1997	6	154333183	0.015	0.2281	1.9e-09	0.00242098	462166	6	154333183	0.00883446	36.0737
rs9654453	C	T	C	T	0.0170405	0.0052	0.129259	0.09063	5	299621	0.0209	0.8033	1.7e-10	0.00266903	462166	5	299621	0.00939353	40.7842
rs9673839	G	A	G	A	0.0109063	-0.0001	0.490971	0.454	16	76895693	0.012	0.9931	1.3e-09	0.00179863	462166	16	76895693	0.00892457	36.8133
rs9814758	G	T	G	T	-0.0111552	0.0144	0.355886	0.3227	3	123062657	0.0129	0.2642	2.7e-09	0.00187521	462166	3	123062657	0.00875024	35.3891
rs9835772	T	A	T	A	0.0121296	-0.0026	0.243635	0.2286	3	85766025	0.0143	0.8543	5.6e-09	0.00208107	462166	3	85766025	0.00857288	33.9689
rs9888533	T	C	T	C	0.0108325	-0.0095	0.538081	0.5689	13	107854612	0.0122	0.4364	3e-09	0.00182556	462166	13	107854612	0.00872483	35.1839
rs9902846	T	C	T	C	0.0133756	-0.0015	0.316036	0.3029	17	4040774	0.0131	0.9105	4.2e-12	0.00192994	462166	17	4040774	0.0101937	48.029
rs9916444	G	C	G	C	0.0114738	-0.0187	0.34174	0.2925	17	42313512	0.0132	0.1556	1.3e-09	0.0018902	462166	17	42313512	0.00892457	36.8133
rs9926784	C	T	C	T	-0.0132587	0.0112	0.184548	0.1712	16	19941968	0.0159	0.4806	8.7e-09	0.00230452	462166	16	19941968	0.00846407	33.112

## Sheet: hypertension
SNP	effect_allele.exposure	other_allele.exposure	effect_allele.outcome	other_allele.outcome	beta.exposure	beta.outcome	eaf.exposure	eaf.outcome	chr	pos	se.outcome	pval.outcome	pos.exposure	chr.exposure	se.exposure	pval.exposure	samplesize.exposure	R2	F
rs10059884	A	C	A	C	0.0129429	-0.0116	0.596209	0.5856	5	32832474	0.0122	0.3385	32832474	5	0.000914148	1.69981e-45	462933	0.0208021	200.41
rs10061288	G	A	G	A	-0.00717078	0.0028	0.515183	0.4562	5	114389826	0.012	0.8145	114389826	5	0.000897735	1.39991e-15	462933	0.0117358	63.7677
rs10282122	T	C	T	C	-0.00656527	0.0119	0.665297	0.7402	7	2529623	0.0137	0.3881	2529623	7	0.000951716	5.30029e-12	462933	0.0101367	47.5726
rs10457174	T	C	T	C	0.00653277	0.01	0.196875	0.1301	6	97067047	0.0178	0.573801	97067047	6	0.00113551	8.79995e-09	462933	0.00845422	33.0898
rs1048070	C	T	C	T	0.00515096	0.01	0.535827	0.5365	9	14735053	0.0121	0.4088	14735053	9	0.000917968	2e-08	462933	0.00824793	31.4946
rs10491475	A	C	A	C	-0.00508215	-0.0127	0.429811	0.4321	5	77916305	0.0121	0.2948	77916305	5	0.000906733	2.1e-08	462933	0.00823551	31.3998
rs10500326	T	G	T	G	-0.00769248	-0.0121	0.23647	0.1959	16	4918326	0.0151	0.4251	4918326	16	0.00105717	3.40017e-13	462933	0.0106955	52.9623
rs10900127	A	C	A	C	-0.0057941	0.0071	0.504835	0.4476	10	45390103	0.0121	0.559899	45390103	10	0.000915326	2.5e-10	462933	0.00929865	40.0307
rs10930990	G	C	G	C	-0.00602194	-0.0077	0.321347	0.3253	2	182996457	0.0128	0.5498	182996457	2	0.00096762	4.90004e-10	462933	0.00914477	38.7167
rs11072508	T	C	T	C	-0.011038	-0.0126	0.669579	0.5642	15	75062397	0.0121	0.2971	75062397	15	0.000957232	9.20026e-31	462933	0.0169453	132.965
rs11086052	A	G	A	G	0.00764151	-0.0077	0.279051	0.2172	19	17169081	0.0145	0.595701	17169081	19	0.00100215	2.39994e-14	462933	0.0112093	58.1735
rs1115460	A	G	A	G	0.00526644	-0.0146	0.670794	0.7054	20	6398572	0.0131	0.2673	6398572	20	0.00095581	3.59998e-08	462933	0.00809719	30.3538
rs111896658	T	C	T	C	-0.0100829	0.0214	0.108887	0.1019	16	4167239	0.0197	0.2787	4147630	16	0.00144611	3.10027e-12	462933	0.0102481	48.6242
rs11190709	A	G	A	G	0.00857061	-0.0296	0.888875	0.9375	10	102552663	0.0249	0.2347	102552663	10	0.00143315	2.19999e-09	462933	0.00879212	35.788
rs11191607	T	G	T	G	-0.017465	0.013	0.077457	0.09079	10	104959188	0.0208	0.5324	104959188	10	0.00167693	2.09991e-25	462933	0.0153068	108.489
rs11199851	C	A	C	A	0.00683369	0.0101	0.204808	0.1349	10	122996928	0.0177	0.5686	122996928	10	0.00111602	9.20005e-10	462933	0.00899845	37.4875
rs11212197	A	G	A	G	0.00579373	0.0145	0.326177	0.3096	11	107262510	0.013	0.2655	107262510	11	0.000958807	1.5e-09	462933	0.00888332	36.5343
rs112767262	T	C	T	C	0.00798101	0.0109	0.18785	0.223	16	3750623	0.0145	0.4532	3750623	16	0.00115522	4.90004e-12	462933	0.0101531	47.7266
rs115262049	T	A	T	A	-0.00979727	0.0436	0.087748	0.07662	2	43196694	0.0227	0.0545004	43196694	2	0.00159532	8.19993e-10	462933	0.00902535	37.712
rs11616092	G	A	G	A	-0.00615154	-0.0091	0.273	0.2667	12	8845493	0.0136	0.5048	8845493	12	0.0010088	1.09999e-09	462933	0.00895653	37.139
rs11688682	C	G	C	G	-0.00621807	-0.0074	0.271015	0.2508	2	121347612	0.014	0.5974	121347612	2	0.00104261	2.5e-09	462933	0.00876148	35.539
rs11692391	C	T	C	T	-0.00632584	-0.0241	0.21518	0.2228	2	113695120	0.0144	0.0945606	113695120	2	0.00108982	6.49995e-09	462933	0.00852914	33.679
rs11692449	C	T	C	T	-0.00614942	-0.0184	0.36685	0.439	2	61704451	0.0121	0.1287	61704451	2	0.000928988	3.59998e-11	462933	0.00972877	43.8201
rs11724647	A	T	A	T	-0.00940922	-0.0236	0.18372	0.218	4	156646340	0.0145	0.1036	156646340	4	0.00115908	4.70002e-16	462933	0.011932	65.9183
rs117464403	A	G	A	G	0.0196768	0.0555	0.019131	0.0247	10	107158054	0.0392	0.1566	107158054	10	0.00328268	2e-09	462933	0.0088149	35.9737
rs12035750	C	T	C	T	0.00589603	-0.0005	0.382918	0.2671	1	89333557	0.0136	0.9732	89332099	1	0.000923596	1.7e-10	462933	0.00938575	40.7842
rs12258967	G	C	G	C	-0.0106243	0.021	0.299311	0.2207	10	18727959	0.0145	0.1479	18727959	10	0.000980732	2.39994e-27	462933	0.0159198	117.355
rs12627514	G	C	G	C	0.00695894	-0.0021	0.283791	0.3207	21	44759440	0.0129	0.8728	44759440	21	0.000998038	3.10027e-12	462933	0.0102481	48.6242
rs12702586	A	G	A	G	0.0121916	-0.0196	0.111995	0.1402	7	7211940	0.0173	0.2584	7211940	7	0.00142284	1e-17	462933	0.0126005	73.5125
rs12714414	C	T	C	T	-0.00716148	-0.0251	0.152482	0.1626	2	651407	0.0162	0.1205	651407	2	0.00129457	3.2e-08	462933	0.0081276	30.5823
rs1275988	T	C	T	C	-0.0140941	-0.0115	0.615229	0.542	2	26914364	0.0121	0.3389	26914364	2	0.000922812	1.20005e-52	462933	0.0224383	233.192
rs12786744	C	T	C	T	-0.0062928	-0.0041	0.211575	0.2465	11	58177549	0.0141	0.7724	58177549	11	0.00109836	1e-08	462933	0.00842241	32.8413
rs12906962	C	T	C	T	0.00614902	-0.0001	0.32034	0.3972	15	95312071	0.0123	0.9908	95312071	15	0.000968275	2.1e-10	462933	0.00933812	40.3713
rs12948326	G	T	G	T	0.00540283	0.0018	0.350531	0.3659	17	43188117	0.0124	0.8833	43188117	17	0.000944536	1.09999e-08	462933	0.00839862	32.656
rs13125101	A	G	A	G	0.0212658	0.0092	0.291836	0.3451	4	81174592	0.0127	0.4656	81174592	4	0.000988617	1.1995e-102	462933	0.0316015	462.77
rs13257887	C	T	C	T	-0.00619465	0.0096	0.35893	0.3328	8	10187716	0.0202	0.6349	10187716	8	0.00102872	1.7e-09	462933	0.00885362	36.2904
rs1422278	T	G	T	G	0.00945522	0.027	0.132044	0.232	5	122467417	0.0142	0.0577404	122467417	5	0.00132451	9.3994e-13	462933	0.010492	50.9657
rs1436138	G	A	G	A	-0.00739454	-0.0101	0.360645	0.3574	17	75316880	0.0126	0.4189	75316880	17	0.000938222	3.19963e-15	462933	0.011585	62.1395
rs145153053	G	A	G	A	0.00767235	0.0062	0.169306	0.1963	17	45138033	0.0151	0.6806	45138033	17	0.0011983	1.5e-10	462933	0.00941385	41.0288
rs1515110	T	G	T	G	0.00510501	0.0116	0.636731	0.6175	2	227122216	0.0123	0.3442	227122216	2	0.000931996	4.30002e-08	462933	0.0080511	30.0092
rs167479	T	G	T	G	-0.0131587	-0.0061	0.472462	0.425	19	11526765	0.0122	0.6182	11526765	19	0.000898701	1.50003e-48	462933	0.021516	214.409
rs1689040	T	C	T	C	-0.011369	0.0197	0.407647	0.2887	12	89978233	0.0132	0.1362	89978233	12	0.000913632	1.50003e-35	462933	0.018287	154.863
rs1741344	T	C	T	C	0.00538176	0.0056	0.634509	0.6565	20	4101800	0.0127	0.6584	4101800	20	0.000931546	7.59994e-09	462933	0.00849055	33.3749
rs17637472	A	G	A	G	0.00861819	-0.011	0.398638	0.4428	17	47461433	0.0121	0.3638	47461433	17	0.000924195	1.10002e-20	462933	0.0137055	86.9732
rs17747401	T	C	T	C	-0.00541349	0.0001	0.368809	0.3407	10	76400164	0.0127	0.9955	76400164	10	0.000935245	7.10003e-09	462933	0.00850737	33.5072
rs1799998	G	A	G	A	-0.00546115	0.0213	0.450657	0.4981	8	143999600	0.012	0.0764293	143999600	8	0.000901191	1.40001e-09	462933	0.00889965	36.6688
rs1814952	T	C	T	C	0.00571216	0.0136	0.283964	0.2893	4	52807245	0.0132	0.3037	52807245	4	0.000993236	8.9e-09	462933	0.00845141	33.0678
rs1859551	G	A	G	A	0.00511058	-0.0122	0.477432	0.568	14	72165208	0.0121	0.3146	72165208	14	0.000900843	1.40001e-08	462933	0.00833814	32.1873
rs188315257	G	T	G	T	-0.010802	-0.0012	0.092053	0.073	2	25262928	0.0231	0.9587	25241386	2	0.00155991	4.40048e-12	462933	0.0101755	47.9374
rs1887320	A	G	A	G	0.0106438	-0.0087	0.475317	0.4346	20	10965998	0.0121	0.4697	10965998	20	0.000900496	3.10027e-32	462933	0.0173688	139.697
rs1923031	C	T	C	T	-0.00780776	0.0173	0.614463	0.6145	20	62483911	0.0124	0.1646	62483911	20	0.000945459	1.50003e-16	462933	0.0121341	68.1698
rs2032915	T	C	T	C	-0.00598366	-0.0019	0.359731	0.3825	16	31117413	0.0123	0.8758	31117413	16	0.000934788	1.5e-10	462933	0.00941385	41.0288
rs204883	A	G	A	G	0.00778339	0.005	0.384525	0.4564	6	32032743	0.0122	0.681201	32032743	6	0.000920418	2.80027e-17	462933	0.0124252	71.4804
rs2078339	G	A	G	A	-0.00772915	0.0065	0.271821	0.1815	12	20161168	0.0156	0.675601	20161168	12	0.00100886	1.80011e-14	462933	0.0112636	58.7393
rs2105092	A	G	A	G	-0.00709777	-0.0029	0.291089	0.228	6	134184972	0.0143	0.8389	134184972	6	0.00098884	7.10068e-13	462933	0.0105485	51.5163
rs2251828	A	G	A	G	0.00592145	0.0043	0.754424	0.7594	6	15479363	0.014	0.757201	15479363	6	0.00104159	1.29999e-08	462933	0.00835677	32.3313
rs2293251	G	T	G	T	0.0068858	0.0037	0.1566	0.1059	3	138124114	0.0195	0.8476	138124114	3	0.0012357	2.5e-08	462933	0.00819101	31.0614
rs2294214	C	A	C	A	-0.0055795	0.0076	0.31594	0.2507	6	22056923	0.0139	0.5857	22056923	6	0.000963432	7.00003e-09	462933	0.00851087	33.5348
rs2298359	C	T	C	T	-0.0131885	-0.0121	0.065123	0.07295	21	33671140	0.0233	0.6023	33671140	21	0.00181983	4.30031e-13	462933	0.0106488	52.501
rs2311412	C	T	C	T	-0.00530779	0.0034	0.495669	0.4797	2	69010557	0.012	0.774499	69010557	2	0.000899501	3.59998e-09	462933	0.00867352	34.8289
rs231708	C	G	C	G	-0.00573449	-0.0224	0.687274	0.7379	4	2694773	0.0136	0.0991996	2694773	4	0.000967339	3.09999e-09	462933	0.00870969	35.12
rs2341599	A	G	A	G	-0.00701927	0.0183	0.66041	0.5774	4	156433308	0.0122	0.1325	156433308	4	0.000947893	1.29987e-13	462933	0.0108846	54.8515
rs2443708	C	T	C	T	0.00728822	-0.0029	0.683078	0.6283	3	11545719	0.0124	0.8164	11545719	3	0.000966422	4.60045e-14	462933	0.0110853	56.8936
rs2455357	G	A	G	A	-0.00613367	-0.0081	0.705756	0.6635	5	692887	0.0137	0.554501	688900	5	0.00109777	2.30001e-08	462933	0.00821232	31.2232
rs2460448	A	G	A	G	-0.00808064	0.0067	0.437841	0.3799	16	89708096	0.0124	0.5883	89700881	16	0.000906743	5.00035e-19	462933	0.0130976	79.4283
rs2569882	C	T	C	T	-0.00579055	0.0003	0.435259	0.3764	6	1620147	0.0125	0.9838	1620147	6	0.000910921	2.1e-10	462933	0.00933812	40.3713
rs2643826	T	C	T	C	0.0106264	0.0117	0.452318	0.4048	3	27562988	0.0122	0.3388	27562988	3	0.000903762	6.4003e-32	462933	0.0172791	138.258
rs268263	A	T	A	T	0.007854	-0.0175	0.751622	0.7915	2	164954174	0.0148	0.2375	164954174	2	0.00104552	5.79963e-14	462933	0.0110408	56.4381
rs2744133	G	A	G	A	-0.00653248	0.007	0.277513	0.2756	6	22392260	0.0134	0.6042	22392260	6	0.00100191	7.00003e-11	462933	0.00958326	42.519
rs27687	C	T	C	T	0.00608825	0.0037	0.271174	0.2588	5	68032422	0.0137	0.788	68032422	5	0.00101038	1.7e-09	462933	0.00885362	36.2904
rs2820290	G	A	G	A	0.00575237	-0.0056	0.566634	0.5508	1	201783682	0.0121	0.6427	201783682	1	0.000904397	2e-10	462933	0.00934914	40.4667
rs2856653	C	T	C	T	-0.00902048	-0.0181	0.642227	0.6997	11	47361084	0.0131	0.1667	47361084	11	0.00093971	8.10028e-22	462933	0.0141062	92.134
rs28650790	T	C	T	C	0.00809712	0.0047	0.191835	0.1352	5	55861464	0.0176	0.7915	55861464	5	0.00113843	1.10002e-12	462933	0.0104602	50.657
rs2894446	T	G	T	G	-0.00673875	0.0034	0.34048	0.2792	8	129410924	0.0134	0.7994	129410924	8	0.000946932	1.10002e-12	462933	0.0104602	50.657
rs2921965	C	T	C	T	-0.00568897	0.0122	0.286546	0.2664	10	118445251	0.0136	0.3676	118445251	10	0.00099864	1.2e-08	462933	0.00837685	32.4869
rs2934849	C	T	C	T	-0.00560546	0	0.631739	0.6485	6	166162335	0.0126	0.9991	166162335	6	0.000929599	1.6e-09	462933	0.00886802	36.4085
rs2943810	G	C	G	C	0.00629417	0.0065	0.740332	0.7337	11	61279799	0.0137	0.636499	61279799	11	0.001039	1.40001e-09	462933	0.00889965	36.6688
rs2977324	G	T	G	T	0.0071587	-0.0032	0.700729	0.7174	8	76716737	0.0133	0.808	76716737	8	0.0009839	3.40017e-13	462933	0.0106955	52.9623
rs303949	C	A	C	A	0.00872954	0.0145	0.093384	0.09946	13	72365326	0.0201	0.4715	72365326	13	0.00154917	1.79999e-08	462933	0.00827468	31.6992
rs34344953	C	T	C	T	0.00571969	0.0023	0.360612	0.4466	7	156312714	0.0121	0.8515	156312714	7	0.000935702	9.80009e-10	462933	0.00898365	37.3643
rs35429	G	A	G	A	-0.0110645	0.001	0.382051	0.3642	12	115555867	0.0124	0.9341	115555867	12	0.000924745	5.40008e-33	462933	0.0175832	143.168
rs35432681	C	T	C	T	0.00648903	-0.0025	0.382319	0.4425	3	133966291	0.0121	0.8351	133966291	3	0.000923451	2.09991e-12	462933	0.0103283	49.3883
rs35479618	A	G	A	G	0.0255211	-0.0169	0.017236	0.01044	1	153662423	0.0592	0.7756	153662423	1	0.00343987	1.20005e-13	462933	0.0109001	55.0086
rs35942721	T	C	T	C	-0.0076048	0.0046	0.290855	0.1866	3	48173069	0.0154	0.764901	48173069	3	0.000989164	1.50003e-14	462933	0.011298	59.0981
rs36071027	T	C	T	C	-0.00665162	-0.0092	0.357932	0.387	5	158444274	0.0123	0.4559	158444274	5	0.000937598	1.29987e-12	462933	0.0104263	50.3294
rs36174733	G	A	G	A	-0.00677219	-0.0163	0.179743	0.156	12	133781163	0.0166	0.3259	133781163	12	0.00116831	6.80002e-09	462933	0.00851802	33.5912
rs3735533	C	T	C	T	0.0166405	0.009	0.926702	0.9047	7	27245893	0.0206	0.6612	27245893	7	0.00171939	3.69999e-22	462933	0.0142243	93.6848
rs3759582	C	A	C	A	-0.00827667	-0.0011	0.127723	0.1258	14	103989892	0.0181	0.9509	103989892	14	0.00134949	8.60003e-10	462933	0.00901422	37.6191
rs3785837	A	G	A	G	0.0074595	-0.0196	0.766003	0.7498	17	59468942	0.0139	0.1574	59468942	17	0.00107275	3.59998e-12	462933	0.0102172	48.3311
rs3790604	A	C	A	C	0.0187271	0.0024	0.073158	0.1709	1	113046879	0.016	0.8815	113046879	1	0.00172638	1.99986e-27	462933	0.0159443	117.717
rs3803266	C	G	C	G	-0.00769725	-0.0061	0.767939	0.6406	13	30154349	0.0125	0.6255	30154349	13	0.00106429	4.70002e-13	462933	0.0106311	52.3264
rs3821843	A	G	A	G	0.00840648	-0.0097	0.678981	0.6592	3	53558012	0.0128	0.4505	53558012	3	0.000976299	7.29962e-18	462933	0.0126536	74.1338
rs3863105	C	T	C	T	0.00611387	0.0141	0.674287	0.7317	3	169283495	0.0136	0.3017	169283495	3	0.000962822	2.19999e-10	462933	0.00932761	40.2805
rs3918226	T	C	T	C	0.0251981	-0.0417	0.08101	0.06985	7	150690176	0.0236	0.07787	150690176	7	0.0016684	1.50003e-51	462933	0.0221951	228.162
rs448385	A	G	A	G	0.00681429	-0.0037	0.441371	0.4091	1	25395133	0.0122	0.763001	25395133	1	0.000903464	4.60045e-14	462933	0.0110853	56.8936
rs4651223	T	C	T	C	0.00528924	-0.0106	0.315358	0.3405	1	184580250	0.0127	0.4011	184580250	1	0.000969124	4.79999e-08	462933	0.00802244	29.7959
rs4675682	C	T	C	T	0.00526118	0.0155	0.461008	0.5046	2	208402750	0.012	0.1961	208402750	2	0.000898999	4.79999e-09	462933	0.00860351	34.2689
rs474328	T	C	T	C	0.0054289	0.0186	0.30851	0.3706	1	193240205	0.0124	0.133	193240205	1	0.000969633	2.19999e-08	462933	0.00822366	31.3095
rs4759062	T	C	T	C	-0.00949665	-0.0106	0.298342	0.4729	12	54434908	0.0121	0.3795	54434908	12	0.000983707	4.70002e-22	462933	0.0141884	93.2112
rs4767288	G	A	G	A	-0.00546297	0.0088	0.688254	0.6417	12	115437761	0.0126	0.4826	115437761	12	0.000970391	1.79999e-08	462933	0.00827468	31.6992
rs4775373	C	T	C	T	-0.005689	0.0086	0.638007	0.6974	15	61476936	0.013	0.511	61476936	15	0.000936434	1.2e-09	462933	0.00893605	36.9694
rs4783581	C	G	C	G	-0.0063523	-0.0217	0.774824	0.786	16	69552785	0.0148	0.1417	69552785	16	0.00108529	4.79999e-09	462933	0.00860351	34.2689
rs483465	G	A	G	A	0.00696887	-0.0244	0.749302	0.8479	3	136047977	0.0167	0.1427	136047977	3	0.00103533	1.69981e-11	462933	0.0098905	45.2892
rs4883481	C	T	C	T	-0.00756598	0.0044	0.627661	0.6289	12	50574311	0.0124	0.7219	50574311	12	0.000927099	3.29989e-16	462933	0.0119949	66.6155
rs488834	T	C	T	C	-0.00839858	0.0087	0.766097	0.7502	1	10767902	0.014	0.5349	10767902	1	0.0010577	1.99986e-15	462933	0.011671	63.0651
rs4930676	T	C	T	C	-0.00805959	0.0409	0.108456	0.06977	11	69071115	0.0236	0.0829793	69070800	11	0.00144286	2.30001e-08	462933	0.00821232	31.2232
rs537244	T	G	T	G	-0.00687581	0.0017	0.570794	0.6529	15	41469313	0.0126	0.8927	41469313	15	0.000907302	3.50026e-14	462933	0.0111375	57.4311
rs557675	G	T	G	T	-0.00749399	-0.0193	0.470443	0.3971	11	65566719	0.0123	0.1147	65566719	11	0.00089978	8.19974e-17	462933	0.0122396	69.3609
rs55944332	G	A	G	A	0.00653855	-0.0043	0.235934	0.2554	2	145726621	0.0138	0.755299	145726621	2	0.00105935	6.69993e-10	462933	0.00907238	38.1061
rs56153133	G	A	G	A	-0.0158264	-0.0035	0.1622	0.1446	1	11885647	0.0171	0.8383	11885647	1	0.00121689	1.10002e-38	462933	0.0191151	169.211
rs56388530	T	C	T	C	0.0094542	0.0107	0.75941	0.8285	4	106910958	0.0159	0.4992	106910958	4	0.00104874	1.99986e-19	462933	0.0132461	81.2392
rs569550	G	T	G	T	0.0113813	-0.0104	0.387964	0.4199	11	1887068	0.0122	0.3917	1887068	11	0.000923887	7.19946e-35	462933	0.0181021	151.746
rs57139556	G	A	G	A	-0.0183069	0.0015	0.071575	0.1062	6	150998511	0.0194	0.9398	150998511	6	0.00173904	6.4998e-26	462933	0.0154699	110.814
rs59980837	T	G	T	G	0.030137	0.0077	0.017712	0.01251	1	115827266	0.0534	0.8856	115827266	1	0.00339588	7.00003e-19	462933	0.0130427	78.7637
rs6026739	T	A	T	A	0.0191373	-0.0309	0.117656	0.1693	20	57739469	0.0161	0.0541003	57739469	20	0.00139985	1.50003e-42	462933	0.0200897	186.913
rs6031431	G	A	G	A	0.00725662	-0.0203	0.460526	0.494	20	42795152	0.012	0.0915609	42795152	20	0.000905914	1.10002e-15	462933	0.0117794	64.2426
rs604723	C	T	C	T	0.0145019	0.0071	0.725081	0.7411	11	100610546	0.0137	0.6053	100610546	11	0.00101129	1.20005e-46	462933	0.021074	205.686
rs6090907	A	G	A	G	-0.00750749	-0.0178	0.14983	0.09126	20	47410231	0.0208	0.3926	47410231	20	0.00126055	2.59998e-09	462933	0.00875206	35.4626
rs6108168	A	C	A	C	-0.0108666	-0.0104	0.254386	0.2293	20	8626271	0.0143	0.465	8626271	20	0.0010302	5.19996e-26	462933	0.0155007	111.256
rs61772592	G	A	G	A	0.00911074	0.0095	0.12382	0.1679	1	56979681	0.016	0.5541	56979681	1	0.00136661	2.60016e-11	462933	0.0097992	44.4569
rs62039768	A	C	A	C	0.0108998	-0.007	0.096337	0.08932	16	51560761	0.0212	0.7402	51560761	16	0.00153381	1.20005e-12	462933	0.0104425	50.4862
rs62043959	C	A	C	A	-0.00751939	-0.0055	0.280846	0.2376	16	81525204	0.0141	0.696599	81525204	16	0.00100461	7.19946e-14	462933	0.0109992	56.013
rs62189015	C	T	C	T	-0.00914529	0.002	0.101151	0.1242	2	162583504	0.0182	0.9124	162583504	2	0.00150035	1.09999e-09	462933	0.00895653	37.139
rs62481856	A	G	A	G	0.00996236	0.0052	0.197642	0.2977	7	106414069	0.0132	0.6928	106412082	7	0.00112579	8.80035e-19	462933	0.0130052	78.3116
rs6271	T	C	T	C	-0.013259	-0.0176	0.073863	0.06676	9	136522274	0.0242	0.4673	136522274	9	0.00171351	1e-14	462933	0.011374	59.8961
rs6441207	T	C	T	C	0.0056617	0.0068	0.402922	0.3793	3	158282459	0.0124	0.581201	158282459	3	0.000915044	6.1e-10	462933	0.00909415	38.2892
rs6595833	T	C	T	C	0.00735974	-0.0134	0.410477	0.3466	5	127843208	0.0126	0.2879	127843208	5	0.000914798	8.60003e-16	462933	0.0118238	64.7276
rs6666703	T	C	T	C	-0.00549363	0.0099	0.289694	0.3403	1	153943800	0.0127	0.4356	153943800	1	0.000990499	2.90001e-08	462933	0.00815294	30.7733
rs67755137	A	G	A	G	0.00747618	0.0319	0.193311	0.1507	7	74108135	0.0168	0.0578003	74108135	7	0.0011357	4.60045e-11	462933	0.00967535	43.3402
rs682709	G	C	G	C	0.00687977	-0.0177	0.668105	0.6127	13	22294082	0.0124	0.154	22294082	13	0.000964778	1e-12	462933	0.0104794	50.8441
rs6848906	C	T	C	T	-0.0106107	-0.0166	0.848791	0.807	4	111386198	0.0152	0.2749	111386198	4	0.0012506	2.19989e-17	462933	0.0124665	71.9565
rs6855246	G	A	G	A	-0.0126807	0.0204	0.081084	0.01456	4	103112470	0.051	0.6897	103112470	4	0.00170449	1e-13	462933	0.0109356	55.367
rs696	T	C	T	C	0.00517754	-0.0009	0.364007	0.3895	14	35871093	0.0123	0.9398	35871093	14	0.000932697	2.80001e-08	462933	0.00816196	30.8414
rs6961048	G	C	G	C	0.0108579	0.011	0.101305	0.1354	7	27328187	0.0176	0.5305	27328187	7	0.00148711	2.80027e-13	462933	0.0107339	53.3436
rs6983948	T	C	T	C	-0.00587633	-0.007	0.528647	0.5385	8	95990283	0.012	0.560101	95988209	8	0.000898118	6.00067e-11	462933	0.00961715	42.8203
rs7009973	G	A	G	A	0.00547402	-0.0143	0.321757	0.2936	8	23374454	0.0132	0.2793	23374454	8	0.00096157	1.2e-08	462933	0.00837685	32.4869
rs706406	A	C	A	C	0.00563334	-0.0043	0.389882	0.3079	1	56627288	0.013	0.738999	56627288	1	0.000921203	9.59997e-10	462933	0.00898848	37.4045
rs71371126	A	G	A	G	0.00530599	0.0234	0.343358	0.3569	17	28150359	0.0125	0.0613098	28002642	17	0.000946641	2.1e-08	462933	0.00823551	31.3998
rs71631245	T	C	T	C	0.0164647	0.0286	0.024776	0.03197	3	183957218	0.0341	0.4019	183931860	3	0.00289133	1.2e-08	462933	0.00837685	32.4869
rs7237714	G	A	G	A	0.00869762	0.0205	0.132902	0.1695	18	1910859	0.016	0.1991	1910859	18	0.00132558	5.30029e-11	462933	0.00964438	43.0631
rs7258382	C	T	C	T	-0.0115164	-0.0189	0.1659	0.08583	19	7262569	0.0217	0.383	7262569	19	0.00120577	1.29987e-21	462933	0.0140343	91.1981
rs72677850	A	G	A	G	-0.0234357	0.0244	0.018719	0.01097	14	50849397	0.0585	0.677001	50849397	14	0.00338669	4.49987e-12	462933	0.0101709	47.8936
rs7278003	C	T	C	T	0.00510515	-0.0041	0.555381	0.6832	21	45020919	0.0129	0.7489	44966069	21	0.000903796	1.6e-08	462933	0.00830448	31.9279
rs72801474	A	G	A	G	-0.0092404	0.0053	0.091758	0.05756	5	132444128	0.0258	0.8383	132444128	5	0.00155365	2.69998e-09	462933	0.00874299	35.3891
rs72831343	G	T	G	T	-0.0201099	-0.0087	0.145114	0.1021	10	63515681	0.0198	0.6605	63515681	10	0.00127261	2.99985e-56	462933	0.0232191	249.713
rs72915163	T	C	T	C	0.00795953	0.0148	0.258533	0.2188	18	48792829	0.0146	0.3112	48792829	18	0.00103729	1.69981e-14	462933	0.0112744	58.8521
rs73050466	A	G	A	G	-0.016241	-0.0185	0.030072	0.08683	7	1141575	0.0216	0.3931	1141575	7	0.00266298	1.09999e-09	462933	0.00895653	37.139
rs73098804	A	T	A	T	0.00819459	0.0436	0.130305	0.05616	4	17865865	0.026	0.093981	17865865	4	0.00133989	9.59997e-10	462933	0.00898848	37.4045
rs7340705	C	T	C	T	0.00677796	0.0219	0.323263	0.3612	3	53734443	0.0125	0.0800405	53734443	3	0.00096552	2.19989e-12	462933	0.0103188	49.2971
rs73693253	T	C	T	C	-0.00884618	-0.0027	0.105663	0.04294	8	81380284	0.0293	0.9271	81380284	8	0.00146053	1.40001e-09	462933	0.00889965	36.6688
rs73728279	T	G	T	G	0.00778142	-0.0272	0.282736	0.2253	7	151411494	0.0144	0.0591194	151411494	7	0.000997953	6.29941e-15	462933	0.01146	60.8057
rs740047	T	C	T	C	0.00657594	0.0214	0.799544	0.7537	7	92230162	0.0139	0.1246	92230162	7	0.00112108	4.49997e-09	462933	0.00861926	34.3945
rs74439044	C	T	C	T	0.0133165	0.0324	0.096974	0.1553	17	7781019	0.0166	0.0503895	7781019	17	0.00151444	1.50003e-18	462933	0.0129175	77.2583
rs7498127	A	G	A	G	-0.00613362	0.0156	0.538571	0.5504	16	49774755	0.012	0.1932	49774755	16	0.000900437	9.60064e-12	462933	0.0100119	46.4083
rs75523587	A	T	A	T	0.0068243	-0.0074	0.181992	0.14	10	134413583	0.0173	0.6708	134413583	10	0.00116183	4.30002e-09	462933	0.00863034	34.4829
rs76038906	T	G	T	G	0.0169645	0.0354	0.035073	0.01232	9	113250200	0.0536	0.5088	113250200	9	0.0024547	4.79954e-12	462933	0.0101574	47.7672
rs7700842	C	T	C	T	-0.0112029	0.0045	0.371103	0.3444	5	157824183	0.0126	0.721499	157824183	5	0.00092786	1.50003e-33	462933	0.0177387	145.713
rs7763350	C	A	C	A	0.00831914	0.024	0.322189	0.3042	6	43349308	0.013	0.0656599	43349308	6	0.000958994	4.10015e-18	462933	0.0127504	75.2726
rs7777545	C	T	C	T	-0.00624618	0.0055	0.407524	0.3549	7	134210294	0.0126	0.662101	134210294	7	0.00091476	8.60003e-12	462933	0.0100352	46.624
rs77924615	A	G	A	G	-0.0119344	0.0178	0.196673	0.2224	16	20392332	0.0145	0.2202	20392332	16	0.00113999	1.20005e-25	462933	0.0153848	109.598
rs7805240	T	C	T	C	0.00567977	0.0035	0.400556	0.4131	7	131120971	0.0122	0.7716	131120971	7	0.000915438	5.49997e-10	462933	0.00911811	38.4913
rs7831859	C	T	C	T	-0.00512481	0.0054	0.428484	0.413	8	101676642	0.0122	0.659699	101676642	8	0.000908581	1.7e-08	462933	0.00828915	31.8102
rs7844259	A	G	A	G	0.00656456	0.0067	0.742167	0.7896	8	102749408	0.0148	0.6497	102749408	8	0.00103454	2.19999e-10	462933	0.00932761	40.2805
rs7911644	T	C	T	C	0.00757404	-0.0212	0.330423	0.3166	10	18468589	0.0129	0.099591	18468589	10	0.000956423	2.39994e-15	462933	0.0116377	62.7059
rs79384779	T	C	T	C	0.00788049	0.0062	0.146475	0.1948	20	31214944	0.0153	0.6863	31214944	20	0.00128513	8.70001e-10	462933	0.00901152	37.5965
rs8002514	A	G	A	G	0.00625225	0.0052	0.235188	0.2369	13	115002305	0.0141	0.7089	115002305	13	0.00105781	3.40001e-09	462933	0.00868736	34.9401
rs8027450	T	C	T	C	0.0117734	-0.0032	0.32312	0.2675	15	91418394	0.0136	0.8118	91418394	15	0.000963142	2.29985e-34	462933	0.017964	149.438
rs8067500	T	C	T	C	0.00531315	0.0161	0.612094	0.6584	17	7172631	0.0126	0.2018	7172631	17	0.000922204	8.30004e-09	462933	0.00846873	33.2035
rs8070737	T	G	T	G	0.00717181	0.0146	0.183032	0.195	17	3981066	0.0151	0.3331	3981066	17	0.00116025	6.4e-10	462933	0.00908301	38.1955
rs8073626	T	C	T	C	-0.00528186	0.003	0.532592	0.6134	17	76790279	0.0123	0.8099	76790279	17	0.000900841	4.49997e-09	462933	0.00861926	34.3945
rs8077276	A	G	A	G	-0.0092985	-0.0194	0.624294	0.6147	17	61547562	0.0123	0.1167	61547562	17	0.000931271	1.80011e-23	462933	0.0146716	99.6702
rs8078510	A	G	A	G	-0.00681361	-0.0024	0.273964	0.2503	17	47045862	0.0138	0.86	47045862	17	0.00101209	1.69981e-11	462933	0.0098905	45.2892
rs8093196	T	G	T	G	0.00697194	-0.0215	0.670122	0.7102	18	42113270	0.0132	0.1025	42113270	18	0.000958126	3.40017e-13	462933	0.0106955	52.9623
rs8243	A	C	A	C	-0.00517753	0.0116	0.618532	0.6849	2	37477794	0.0129	0.3663	37477794	2	0.00092281	2e-08	462933	0.00824793	31.4946
rs893929	A	G	A	G	-0.00686233	0.0074	0.454504	0.4913	4	144187380	0.012	0.5371	144187380	4	0.000903698	3.10027e-14	462933	0.0111606	57.6698
rs906754	A	G	A	G	-0.00652183	-0.0122	0.251562	0.216	5	63820119	0.0146	0.4033	63820119	5	0.00103439	2.90001e-10	462933	0.00926492	39.7408
rs9286351	G	A	G	A	0.00605282	-0.0124	0.41792	0.468	4	138441530	0.012	0.3041	138441530	4	0.000911548	3.10027e-11	462933	0.00976118	44.1125
rs9375459	T	C	T	C	0.0120377	-0.019	0.437121	0.4952	6	127147704	0.012	0.1139	127147704	6	0.000903121	1.59993e-40	462933	0.0195844	177.625
rs9479072	T	C	T	C	-0.00533388	0.0018	0.597145	0.6048	6	151890789	0.0123	0.8806	151890789	6	0.000914177	5.39995e-09	462933	0.00857469	34.0397
rs951914	C	G	C	G	0.00901473	-0.0144	0.713818	0.6551	8	25878995	0.0126	0.2558	25878995	8	0.000999211	1.80011e-19	462933	0.013263	81.4472
rs9836592	T	C	T	C	0.00628536	0.0116	0.663858	0.6514	3	53855083	0.0127	0.3589	53855083	3	0.000950902	3.80014e-11	462933	0.009717	43.7142
rs9844972	C	G	C	G	0.01163	-0.0469	0.071231	0.05429	3	150097635	0.0268	0.0799208	150097635	3	0.0017745	5.60015e-11	462933	0.00963232	42.9554
rs9943599	T	C	T	C	0.00717277	0.0077	0.573867	0.686	11	9752741	0.013	0.5528	9752741	11	0.000908738	2.90001e-15	462933	0.0116031	62.3332

## Sheet: Triglyceride
SNP	effect_allele.exposure	other_allele.exposure	effect_allele.outcome	other_allele.outcome	beta.exposure	beta.outcome	eaf.exposure	eaf.outcome	chr	pos	se.outcome	pval.outcome	chr.exposure	se.exposure	pval.exposure	samplesize.exposure	pos.exposure	R2	F
rs10401969	C	T	C	T	-0.121	0.0013	0.07124	0.06377	19	19407718	0.0245	0.9586	19	0.0065	9.70287e-70	176173	19407718	0.042039	311.894
rs10440120	A	C	A	C	-0.0306	-0.0208	0.1675	0.2057	3	12486964	0.0149	0.1619	3	0.0044	5.34318e-11	174886	12486964	0.0156882	43.0527
rs10501321	C	T	C	T	-0.0216	-0.015	0.314	0.4056	11	47294626	0.0128	0.2391	11	0.0035	1.41198e-08	177680	47294626	0.0134553	32.1738
rs11057408	T	G	T	G	-0.0258	0.0039	0.3628	0.2996	12	124464836	0.0131	0.764901	12	0.0035	2.0488e-12	174454	124464836	0.0168328	49.4438
rs11613352	T	C	T	C	-0.028	-0.0213	0.1913	0.2327	12	57792580	0.0141	0.1304	12	0.0039	9.39723e-14	177799	57792580	0.0176648	55.498
rs12280753	T	C	T	C	0.1931	0.0114	0.06728	0.07095	11	116613660	0.0232	0.622401	11	0.0064	1.21899e-179	177747	116613660	0.06771	818.652
rs12676857	C	T	C	T	0.0332	-0.0059	0.1544	0.1829	8	18266572	0.0155	0.7027	8	0.0046	7.29122e-12	177732	18266572	0.0162517	46.9539
rs12678919	G	A	G	A	-0.1702	0.0168	0.1214	0.08595	8	19844222	0.0214	0.431	8	0.0056	1.8197e-199	177750	19844222	0.0713804	910.292
rs1321257	A	G	A	G	-0.0402	-0.0049	0.5937	0.5608	1	230305312	0.0121	0.6879	1	0.0034	5.98549e-31	177758	230305312	0.0274325	133.87
rs13389219	T	C	T	C	-0.0271	0.0141	0.409	0.3479	2	165528876	0.0126	0.2645	2	0.0034	2.59777e-15	177783	165528876	0.0187557	62.5611
rs16948098	A	G	A	G	0.08	0.0557	0.0409	0.01762	15	44219607	0.0454	0.2199	15	0.0089	4.83838e-17	163328	44219607	0.0207595	70.4169
rs17513135	T	C	T	C	0.022	0.0137	0.2322	0.2185	1	40035686	0.0145	0.3454	1	0.0039	1.63301e-08	174742	40035686	0.0135083	31.8913
rs1832007	G	A	G	A	-0.0327	0.018	0.1319	0.141	10	5254847	0.0172	0.2945	10	0.0047	1.71791e-12	177504	5254847	0.0167458	49.7894
rs2043085	C	T	C	T	-0.0327	0.0155	0.6319	0.5794	15	58680954	0.0121	0.2013	15	0.0034	7.80908e-20	176147	58680954	0.0217175	83.1177
rs2068888	A	G	A	G	-0.0241	-0.0216	0.4908	0.4697	10	94839642	0.012	0.0722005	10	0.0034	1.6819e-11	177712	94839642	0.0159667	45.3159
rs2239520	A	G	A	G	-0.0236	-0.004	0.3734	0.3381	6	31088922	0.013	0.758399	6	0.0037	4.144e-10	151047	31088922	0.0160767	39.049
rs2247056	C	T	C	T	0.0378	0.0117	0.7823	0.7635	6	31265490	0.0152	0.442	6	0.0039	3.861e-21	174062	31265490	0.0226151	89.0672
rs2250802	A	G	A	G	0.023	0.0107	0.6807	0.6818	10	113921354	0.0129	0.4088	10	0.0037	1.21001e-10	174734	113921354	0.0154008	41.4538
rs247616	T	C	T	C	-0.0393	0.0111	0.2929	0.2794	16	56990716	0.0134	0.4064	16	0.0037	1.12305e-25	176146	56989590	0.0249552	109.764
rs2665357	C	A	C	A	0.0212	-0.0069	0.5092	0.5089	6	160848167	0.012	0.5659	6	0.0033	8.32703e-10	172850	160848167	0.0147643	37.6862
rs287621	C	T	C	T	-0.0222	-0.0094	0.7296	0.7136	7	130435181	0.0133	0.4773	7	0.0037	7.67096e-09	177813	130435181	0.013696	33.36
rs2972146	T	G	T	G	0.0281	0.0037	0.6227	0.6384	2	227100698	0.0124	0.764901	2	0.0034	2.97372e-15	174704	227100698	0.0188799	62.295
rs3198697	T	C	T	C	-0.0198	0.0007	0.3826	0.4123	16	15129940	0.0122	0.9539	16	0.0034	2.20699e-08	175934	15129940	0.0133384	31.3062
rs3760627	C	T	C	T	0.0189	-0.0054	0.4683	0.4956	19	45457180	0.012	0.6513	19	0.0034	5.29298e-09	176201	45457180	0.0139065	34.082
rs3761445	A	G	A	G	0.0232	0.0032	0.6148	0.6102	22	38595411	0.0123	0.792899	22	0.0034	8.06121e-12	175846	38595411	0.0163043	46.7571
rs439401	C	T	C	T	0.0659	-0.0015	0.6201	0.7115	19	45414451	0.0132	0.9114	19	0.0038	1.42298e-66	152584	45414451	0.0441039	297.374
rs442177	T	G	T	G	0.0309	-0.0008	0.5528	0.5233	4	88030261	0.012	0.9463	4	0.0033	1.31613e-18	177798	88030261	0.020878	77.5337
rs4587594	A	G	A	G	-0.0694	0.0118	0.31	0.2642	1	63133930	0.0136	0.3864	1	0.0035	3.50268e-82	177772	63133930	0.045521	369.134
rs4719841	G	A	G	A	0.0232	0.0047	0.3826	0.3769	7	25997536	0.0124	0.702999	7	0.0034	8.86339e-11	177775	25997536	0.0153802	42.0625
rs4810479	T	C	T	C	-0.0474	-0.0195	0.7124	0.747	20	44545048	0.0138	0.1564	20	0.0038	2.06681e-34	176192	44545048	0.0291378	149.715
rs6029143	T	C	T	C	-0.0388	0.0162	0.05805	0.03387	20	39118662	0.0329	0.623199	20	0.0071	4.93299e-08	176257	39118662	0.0129898	29.7455
rs634869	C	T	C	T	-0.0272	0.0042	0.562	0.5171	6	139831757	0.012	0.723901	6	0.0033	1.77582e-14	177755	139831757	0.0181811	58.7759
rs645040	T	G	T	G	0.0293	-0.0292	0.7691	0.8514	3	135926622	0.0168	0.0826495	3	0.004	1.83021e-12	177779	135926622	0.016712	49.6651
rs676210	A	G	A	G	-0.0733	0.0098	0.2309	0.2665	2	21231524	0.0136	0.4701	2	0.0039	3.28398e-71	177782	21231524	0.0422989	318.654
rs7248104	A	G	A	G	-0.0222	0.0005	0.4169	0.4346	19	7224431	0.0121	0.9665	19	0.0034	5.04499e-10	176083	7224431	0.0148167	38.6641
rs731839	A	G	A	G	-0.0224	0.001	0.6583	0.6568	19	33899065	0.0126	0.9381	19	0.0036	2.651e-09	176161	33899065	0.0141801	35.4284
rs749671	A	G	A	G	-0.0211	-0.0057	0.3945	0.3839	16	31088347	0.0123	0.6459	16	0.0034	6.10604e-10	176205	31088347	0.01474	38.2915
rs8077889	C	A	C	A	0.0252	-0.001	0.2441	0.2109	17	41878166	0.0147	0.9456	17	0.0042	9.87893e-09	176194	41878166	0.0136569	32.8681
rs9686661	T	C	T	C	0.0379	0.002	0.1768	0.135	5	55861786	0.0176	0.9077	5	0.0044	2.54097e-16	177050	55861786	0.0194704	67.1436
rs998584	A	C	A	C	0.0293	0.0026	0.5145	0.4823	6	43757896	0.0121	0.8278	6	0.0037	3.42373e-15	174573	43757896	0.0188449	62.0174

## Sheet: High density lipoprotein choles
SNP	effect_allele.exposure	other_allele.exposure	effect_allele.outcome	other_allele.outcome	beta.exposure	beta.outcome	eaf.exposure	eaf.outcome	chr	pos	se.outcome	pval.outcome	pos.exposure	chr.exposure	pval.exposure	se.exposure	samplesize.exposure	R2	F
rs10019888	G	A	G	A	-0.027	0.0161	0.1636	0.136	4	26062990	0.0175	0.3581	26062990	4	4.90095e-08	0.0046	187077	0.0126113	29.758
rs10087900	A	G	A	G	-0.0231	-0.0021	0.4393	0.38	8	144303418	0.0124	0.8636	144303418	8	2.174e-09	0.0036	183672	0.0139627	35.8147
rs103294	T	C	T	C	0.0523	0.0032	0.186	0.2936	19	54797848	0.0132	0.8108	54797848	19	3.99485e-30	0.0044	175917	0.0271847	130.099
rs11045163	G	A	G	A	0.0217	-0.0005	0.4063	0.3968	12	20463526	0.0123	0.9706	20463526	12	3.19602e-09	0.0035	187075	0.0136894	35.064
rs11065987	G	A	G	A	-0.0222	0.0183	0.4222	0.3829	12	112072424	0.0123	0.1377	112072424	12	1.22501e-09	0.0035	187119	0.0140478	36.9329
rs11765979	C	A	C	A	0.0412	0.0002	0.4578	0.4636	7	130445877	0.012	0.9872	130445877	7	3.111e-17	0.0048	94311	0.0274855	71.3001
rs11789603	T	C	T	C	0.06	-0.0124	0.08971	0.07547	9	107647019	0.0227	0.5847	107647019	9	3.69488e-21	0.006	184432	0.021981	89.1529
rs12133576	G	A	G	A	-0.0243	-0.0109	0.6451	0.6555	1	93816400	0.0126	0.3889	93816400	1	6.15035e-11	0.0035	187123	0.015118	42.7771
rs12145743	G	T	G	T	0.0203	-0.0146	0.3311	0.3454	1	156700651	0.0126	0.2463	156700651	1	1.80302e-08	0.0036	181336	0.0132204	31.6988
rs12412743	T	C	T	C	-0.0291	-0.0009	0.153	0.1577	10	114045333	0.0164	0.957	114045333	10	1.30701e-09	0.0045	187095	0.0140246	36.8065
rs12740374	T	G	T	G	0.0343	0.0215	0.2124	0.2146	1	109817590	0.0146	0.1421	109817590	1	1.68694e-15	0.0041	186888	0.0184171	63.4112
rs12801636	A	G	A	G	0.0235	-0.0106	0.2243	0.2038	11	65391317	0.0149	0.4772	65391317	11	3.14702e-08	0.0042	187099	0.0127913	30.6173
rs13076253	C	A	C	A	-0.0283	-0.01	0.1478	0.1865	3	131751775	0.0154	0.5153	131751775	3	4.96101e-09	0.0048	186809	0.0135309	34.2079
rs13099479	A	G	A	G	0.036	-0.0135	0.08971	0.07572	3	52677478	0.0225	0.5475	52677478	3	1.81899e-08	0.0062	187132	0.0130105	31.6815
rs13107325	T	C	T	C	-0.0708	-0.0004	0.07784	0.01409	4	103188709	0.0507	0.9944	103188709	4	1.06488e-15	0.0078	179316	0.0189357	64.3183
rs13702	C	T	C	T	0.1058	0.0103	0.3127	0.2591	8	19824492	0.0137	0.4533	19824492	8	1.27938e-160	0.0038	187044	0.0623817	730.714
rs1515110	T	G	T	G	-0.0323	0.0116	0.6187	0.6175	2	227122216	0.0123	0.3442	227122216	2	8.03711e-18	0.0035	187081	0.0198791	73.9587
rs1689797	A	C	A	C	-0.0358	0.009	0.3021	0.2877	1	182150978	0.0132	0.498799	182150978	1	2.85167e-21	0.0036	187126	0.0218848	89.6653
rs16942887	A	G	A	G	0.0831	-0.0058	0.1332	0.1511	16	67928042	0.0167	0.727999	67928042	16	8.28133e-54	0.0051	185604	0.0358368	238.671
rs16965220	A	C	A	C	0.0219	0.012	0.2982	0.2932	16	57065121	0.0132	0.3644	57065121	16	7.90897e-09	0.0037	185512	0.0133968	33.3004
rs17173637	C	T	C	T	-0.0363	-0.0146	0.09763	0.1441	7	150529449	0.0172	0.3955	150529449	7	1.89898e-08	0.0057	183901	0.013107	31.598
rs1866956	T	C	T	C	0.0217	-0.0014	0.6755	0.6482	8	19748921	0.0126	0.9144	19748921	8	7.96398e-10	0.0037	187031	0.0142099	37.7729
rs1883025	T	C	T	C	-0.0698	0.0137	0.2427	0.1945	9	107664301	0.0151	0.3645	107664301	9	1.49589e-65	0.0041	186365	0.0395945	292.624
rs1980493	C	T	C	T	-0.0318	-0.0018	0.1227	0.1474	6	32363215	0.0184	0.9239	32363215	6	3.764e-10	0.0048	183275	0.0146301	39.2359
rs205262	G	A	G	A	-0.0283	0.0202	0.2665	0.2815	6	34563164	0.0134	0.1322	34563164	6	3.87793e-13	0.0039	181707	0.0170297	52.7118
rs2075650	G	A	G	A	-0.0554	-0.0093	0.1266	0.173	19	45395619	0.016	0.5608	45395619	19	9.71628e-26	0.0051	175421	0.0250394	110.052
rs2241210	G	A	G	A	0.0332	0.0119	0.5528	0.474	12	109950144	0.012	0.3224	109950144	12	2.48886e-20	0.0035	174782	0.0220966	85.3796
rs2241770	C	T	C	T	-0.0989	0.0014	0.1029	0.1063	16	56866196	0.0195	0.9422	56866196	16	6.78422e-60	0.0057	185537	0.0378817	266.629
rs2250802	A	G	A	G	-0.034	0.0107	0.6807	0.6818	10	113921354	0.0129	0.4088	113921354	10	2.02209e-17	0.0038	184088	0.0197917	72.1372
rs2278236	A	G	A	G	0.0331	0.0089	0.5435	0.5238	19	8431581	0.012	0.4577	8431581	19	3.18493e-18	0.0035	185450	0.0202115	75.787
rs2290547	A	G	A	G	-0.0297	0.0087	0.2111	0.234	3	47061183	0.0142	0.54	47061183	3	3.69003e-09	0.0046	187142	0.0136322	34.7841
rs2293889	G	T	G	T	0.0312	0.0221	0.5871	0.6922	8	116599199	0.0131	0.0912809	116599199	8	4.27071e-17	0.0035	180102	0.0198039	70.6617
rs2454722	G	A	G	A	0.0351	0.0132	0.1451	0.1648	12	123171218	0.0162	0.4145	123171218	12	3.30826e-14	0.0044	186355	0.0175708	57.5511
rs2606736	T	C	T	C	-0.0246	-0.0008	0.6055	0.5765	3	11400249	0.0122	0.9466	11400249	3	4.79899e-08	0.0043	129328	0.015178	29.7999
rs2925979	C	T	C	T	0.0351	0.016	0.7045	0.6776	16	81534790	0.0129	0.2137	81534790	16	1.32099e-19	0.0037	185553	0.0210273	82.0771
rs3741414	T	C	T	C	0.0296	-0.0224	0.1913	0.2328	12	57844049	0.0141	0.1121	57844049	12	6.09537e-14	0.004	187090	0.0173522	56.3489
rs3822072	A	G	A	G	-0.0251	-0.0231	0.4881	0.5046	4	89741269	0.012	0.0545595	89741269	4	4.05789e-12	0.0034	187115	0.0160316	48.1026
rs3847502	A	C	A	C	0.048	-0.0156	0.314	0.4055	11	47333685	0.0128	0.2229	47333685	11	3.30598e-38	0.0036	187050	0.0298755	167.099
rs3861397	G	A	G	A	-0.024	0.0001	0.3417	0.4128	6	139828916	0.0122	0.9966	139828916	6	8.4004e-11	0.0036	187084	0.0150114	42.1672
rs4142995	T	G	T	G	-0.0263	-0.0244	0.3839	0.2978	7	17919258	0.0131	0.0625504	17919258	7	9.36483e-12	0.0037	165161	0.0167705	46.4637
rs4148005	G	T	G	T	-0.0283	-0.0045	0.2995	0.2984	17	66882466	0.0131	0.730601	66882466	17	5.74249e-14	0.0036	184431	0.017495	56.4663
rs4379922	C	T	C	T	0.0247	-0.018	0.3496	0.3678	12	125351116	0.0125	0.1488	125351116	12	9.55873e-12	0.0036	186203	0.0157878	46.4228
rs4465830	G	A	G	A	-0.0597	0.0299	0.2018	0.1488	20	44585420	0.0168	0.0755005	44585420	20	5.17488e-40	0.0044	185505	0.0307327	175.373
rs4650994	A	G	A	G	-0.021	0.021	0.4828	0.4658	1	178515312	0.0121	0.0808798	178515312	1	6.69607e-09	0.0034	186927	0.0134108	33.6243
rs4660293	G	A	G	A	-0.0353	0.0129	0.2361	0.2172	1	40028180	0.0146	0.3764	40028180	1	2.86286e-18	0.004	187027	0.020154	75.9975
rs4846914	A	G	A	G	0.0479	-0.0041	0.5844	0.5464	1	230295691	0.0121	0.7322	230295691	1	3.51318e-41	0.0034	186995	0.0310735	180.728
rs4917014	G	T	G	T	0.0222	-0.005	0.3404	0.3005	7	50305863	0.013	0.701	50305863	7	1.02601e-08	0.0036	186868	0.0132463	32.7943
rs492571	C	T	C	T	-0.0663	0.0559	0.04222	0.01752	15	44211273	0.0455	0.2189	44211273	15	1.26503e-12	0.009	177352	0.0168537	50.39
rs4939883	C	T	C	T	0.0799	0.0199	0.8193	0.8247	18	47167214	0.0158	0.2073	47167214	18	1.79597e-66	0.0045	185576	0.0399639	296.857
rs4969178	G	A	G	A	0.0263	0.0019	0.6266	0.6502	17	76388202	0.0126	0.8804	76388202	17	1.53215e-12	0.0035	185426	0.0164211	50.0137
rs499974	A	C	A	C	-0.0263	-0.0017	0.1755	0.2291	11	75455021	0.0143	0.9024	75455021	11	1.12001e-08	0.0044	186749	0.0132161	32.6239
rs6450176	A	G	A	G	-0.0254	-0.002	0.2784	0.2465	5	53298025	0.014	0.8852	53298025	5	6.87496e-10	0.0039	187132	0.0142599	38.0598
rs6567160	C	T	C	T	-0.0257	0.0277	0.2309	0.1841	18	57829135	0.0154	0.0726608	57829135	18	2.91803e-09	0.0041	185608	0.0137781	35.2412
rs676210	A	G	A	G	0.066	0.0098	0.2309	0.2665	2	21231524	0.0136	0.4701	21231524	2	2.34477e-54	0.004	187081	0.0358826	241.186
rs6805251	C	T	C	T	-0.02	-0.0091	0.6187	0.6088	3	119560606	0.0122	0.4588	119560606	3	1.33199e-08	0.0035	186301	0.0131635	32.287
rs687339	T	C	T	C	-0.0316	-0.0327	0.7665	0.8486	3	135932359	0.0167	0.0504905	135932359	3	7.10722e-13	0.0042	187105	0.0165919	51.5217
rs7306660	A	G	A	G	-0.0345	0.0002	0.3694	0.3147	12	125327384	0.0129	0.9871	125327384	12	3.34118e-19	0.0036	186939	0.0207139	80.2424
rs731839	A	G	A	G	0.022	0.001	0.6583	0.6568	19	33899065	0.0126	0.9381	33899065	19	3.44096e-09	0.0037	185498	0.0137192	34.9202
rs737337	C	T	C	T	-0.0565	0.0015	0.0686	0.09048	19	11347493	0.0209	0.9425	11347493	19	4.56352e-17	0.0061	185432	0.0194992	70.5304
rs7607980	C	T	C	T	0.0447	0.0004	0.1491	0.09907	2	165551201	0.0202	0.9843	165551201	2	1.80717e-15	0.0052	187036	0.0183901	63.2755
rs9457931	G	A	G	A	-0.0552	0.0299	0.0686	0.1167	6	160929904	0.0188	0.1107	160929904	6	7.29625e-13	0.0073	171669	0.017313	51.4708
rs998584	A	C	A	C	-0.026	0.0026	0.5145	0.4823	6	43757896	0.0121	0.8278	43757896	6	2.26882e-11	0.0038	183791	0.0155985	44.7294
rs9989419	G	A	G	A	0.1473	-0.0023	0.595	0.6154	16	56985139	0.0124	0.8504	56985139	16	1e-200	0.0036	177532	0.0716511	916.121
